# Supplementary material
Source: PubMed Central journal article supplement (PMC7264845)
Supplement: mmc1.pdf [file mmc1.pdf]

**Biophysical Journal, Volume 118**

**Supplemental Information**

**Control of Platelet CLEC-2-Mediated Activation by Receptor Clustering  
and Tyrosine Kinase Signaling**

**Alexey A. Martyanov, Fedor A. Balabin, Joanne L. Dunster, Mikhail A. Panteleev, Jonathan M. Gibbins, and Anastasia N. Sveshnikova**

## 1. Supporting results

### 1.1. Quiescent state reactions incorporated in our model of CLEC-2-induced platelet activation.

The quiescent state of platelet's tyrosine kinase network is supported by a set of phosphatases, among which CD148 (also known as DEP-1 or PTPRJ) has a dominant role (1–3). Here we assume that SFK can exist in four different states which differ in the degree of activation: non-active SFK (Y527 phosphorylated), a third (1/3) active SFK (Y527 dephosphorylated), two thirds (2/3) active (Y416 phosphorylated) and fully active SFK (Y416 phosphorylated and bound to a phosphorylated tyrosine by its SH-2 domain) (4). Non-active SFK is transferred to the 1/3 active state by active CD148 phosphatases (2, 4). On the contrary, 1/3 active SFK can be deactivated by active Csk kinases, which phosphorylate SFK at Y527 (2, 5). 1/3 active SFK turn to a 2/3 active state via autophosphorylation on Y416 (2). This transition is negatively regulated by the active CD148 (1, 2, 4, 6). We assume that fully active SFK are not produced in the quiescent state due to the absence of the phosphorylated receptor molecules. All types of active SFK mediate phosphorylation of CD148 at Y1311 (6), which results in CD148 activation. On the other side, all types of active SFK also mediate Csk activation (7, 8). It is noteworthy that Csk activation in platelets is not regulated directly by SFK. Namely, SFK phosphorylates a protein called paxillin adapter, which binds Csk and this results in Csk activation (7). Active SFK phosphorylates Syk at Y346, which results in Syk initial activation (9).

It is noteworthy that in *in vivo* experiments with SFK<sup>-/-</sup> mice CLEC-2 phosphorylation was present upon stimulation by rhodocytin, while further signal propagation was significantly weakened (10). Furthermore, Hughes *et al.* 2015 demonstrated that for CLEC-2 signalling SFK acts mostly as a positive mediator of Syk basal activation (9).

### 1.2. A detailed description of the model construction in a modular fashion

The “CLEC-2 clustering” module (Fig. 2A) consists of variables for concentrations of CLEC-2 in free, ligand-bound and cluster forms (3 variables, all located in the plasma membrane), fucoidan (1 variable, located in the extracellular space) and 7 parameters, among which 4 concern receptor clustering.

In order to describe cluster formation, we initially used an “N-equation” model (Fig. S1A), which could capture the behavior of the receptor clusters of all sizes (where N is the size of the largest cluster). “N-equation” model of clustering contains 4 parameters: single receptor association and dissociation with clusters rates ( $k_1$ ,  $k_{-1}$ , respectively) and two clusters association and dissociation rates ( $k_2$ ,  $k_{-2}$ , respectively) (11). Formation of clusters of all sizes was described using mass-action kinetics. For example, behaviour of cluster of size three was described by the following equation:

$$\frac{d[3R]}{dt} = k_1([2R] \times [R] - [3R] \times [R]) + k_{-1}([4R] - [3R]) + k_2([2R] \times [R] - [3R] \times [2R]) + k_{-2}([5R] - [3R]).$$

Average cluster size ( $\frac{\sum_{i=1}^n c_i i}{\sum_{i=1}^n c_i}$ , where  $c_i$  – The concentration of the cluster of size  $i$ ), predicted by the model, was fitted to the data from (12). Calculated distribution of cluster sizes at 300s (Fig. S1C) show that the dimerised receptor concentration is prevailing, while a small fraction of receptors remains in a non-dimerized state.

Although the “N-equation” model could capture the literature data, it was poorly applicable to stochastic calculations. Thus, in order to describe receptor clustering, we utilised a “2-equation model” (13) to describe results obtained by the “N-equation” model.

2-equation model contains 5 parameters, which were determined in the process of fitting the 2-equation model to “N-equation” model, which, in turn, was fitted to experimental data from (12) (for equations and parameter values see Tables S2-S4). Average cluster size was calculated as  $s = \frac{C_0^* - C^*}{C^{clust}}$ , where  $C_0^*$  - initial concentration of non-clustered CLEC-2 species,  $C^*$  - transient concentration of the non-clustered CLEC-2 and  $C^{clust}$  – transient CLEC-2 cluster concentration.

Both the full model and 2-equation model were capable of accurately simulating available literature data (Fig. S1D). Furthermore, the number of single receptor molecules, predicted by “2-equation” model, corresponded to the value, predicted by “N-equation” model. Based on these results, we considered “2-equation” model applicable for the description of receptor clustering. Thus, “2-equation” model was used in all further calculations.

The “Quiescent state” module (Fig. 2B) of the model consists of variables for concentrations of CD148 phosphatase in active and passive states (2 variables); Csk in active and passive states (2 variables); SFK in a set of gradually active states: non-active, 1/3 active and 2/3 active (3 variables); Syk kinases in active and passive states (2 variables); TULA-2 in active and passive states (2 variables). “Quiescent state” module contains 19 parameters, common with “Tyrosine kinase” module. The initial concentrations of the species (Table S5) were at steady-state values for the module. The “Quiescent state” module was tuned in order to obtain 5% active Syk kinases required for CLEC-2 phosphorylation (9, 10) and 10% of SFKs ( $Kr^{CD148}$ ,  $Kr^{Csk}$ ,  $Kr^{Syk}$  parameters were estimated). The parameters of the reactions are given in Table S6.

The “Tyrosine kinase” module (Fig. 2C) of the model consists of variables for concentrations of active and inactive Syk kinases (2 variables); SFK in gradually active states: non active, one-third, two-thirds and fully active (4 variables); clustered non phosphorylated and clustered phosphorylated CLEC-2 receptors (2 variables); active and non-active TULA-2 (2 variables).

The unknown parameters of the module ( $Kr^{CLEC2}$ ,  $k_{S1}^{SH2}$ ,  $Kr_{TULA2}^{Syk}$ ,  $Kf_{Syk}^{TULA2}$ ,  $Kr_{Syk}^{TULA2}$ ) were estimated by fitting number of active Syk to data from (14), and the number of Y416 phosphorylated SFK to data from (15) (Fig. 2E and S3, correspondingly).

The “LAT-PLCy2” module (Fig. 2D) consists of variables for concentrations of active Syk (1 variable); phosphorylated and non-phosphorylated LAT (2 variables); LAT-PLCy2 complexes (1 variable); LAT-PLCy2-PI3K complexes (1 variable); phosphoinositides (IP<sub>3</sub>, PIP<sub>2</sub> and PIP<sub>3</sub>, 3 variables); active and non-active Btk (2 variables). The “LAT-PLCy2” module contains 16 parameters. Unknown parameters ( $Kr^{LAT}$ ,  $Kr^{PLC}$ ,  $k_1^{Btk}$ ,  $Kr^{PIP_3}$ ) were estimated by fitting numbers of phosphorylated LAT and active PLCy2 to data from (14) (Fig. 2F and 2G, correspondingly). Initial concentrations of the species in the model and parameter values with equations of the model can be found in tables S7 and S8, correspondingly. The model of Ca<sup>2+</sup> release (Fig. 2D, “Calcium” module) is described in our previous work (16, 17). It is noteworthy that IP<sub>3</sub> concentration in the model of CLEC-2 signalling is a sole link to calcium module and no other positive or negative feedbacks exist in the model. Thus, being the sole generator of IP<sub>3</sub>, active PLCy2 was selected as the main output of the model.

## 2. Supporting Tables.

**Table S1.** Geometric region details.

| Geometric region details          |           |              |                                                                                    |
|-----------------------------------|-----------|--------------|------------------------------------------------------------------------------------|
| Name                              | Parameter | Value        | Ref.                                                                               |
| The volume of extracellular space | $V_{EC}$  | 3.3 $\mu l$  | (18)                                                                               |
| Size of plasmatic membrane        | $S_{PM}$  | 45 $\mu m^2$ | (19)                                                                               |
| Volume of cytosol                 | $V_{Cyt}$ | 4.5 $fl$     | Rate of $\frac{S_{PM}}{V_{Cyt}}$ is conserved from (20)                            |
| Juxtamembrane Volume              | $V_{JM}$  | 1 $fl$       | An artificial parameter used to preserve dimensions in multi-compartment reactions |
| Size of the DTS membrane          | $V_{IM}$  | 1 $fl$       | (19)                                                                               |
| The volume of the DTS             | $V_{DTS}$ | 1.5 $fl$     |                                                                                    |

**Table S2.** “CLEC-2 clustering” module: initial conditions.

| Compartment | Species                                 | Variable | Value         | Ref. |
|-------------|-----------------------------------------|----------|---------------|------|
| EC          | Ligand                                  | $Lig$    | $2 * 10^{14}$ | (14) |
| PM          | Free CLEC-2 molecules                   | $R$      | 2000          | (21) |
|             | CLEC-2 molecules, bound to an activator | $R^*$    | 0             |      |
|             | Clustered CLEC-2 molecules              | $R_c^*$  | 1             |      |

|  |                                 |                       |  |  |
|--|---------------------------------|-----------------------|--|--|
|  | Phosphorylated CLEC-2 molecules | $R_P^*$               |  |  |
|  | All clustered CLEC-2 molecules  | $R_C = R_P^* + R_C^*$ |  |  |

**Table S3.** “CLEC-2 clustering” module: receptor ligation.

| Name                   | Reaction                               | Equation                                                                                       | Parameters                                                              | Ref.      |
|------------------------|----------------------------------------|------------------------------------------------------------------------------------------------|-------------------------------------------------------------------------|-----------|
| <i>CLEC-2 ligation</i> | $M_1$ $R + Lig \rightleftharpoons R^*$ | $S_{PM} \times V_{EC} \times K^{fLig} \times Lig \times R - S_{PM} \times Kr^{Lig} \times R^*$ | $K^{fLig} = 1 s^{-1} \times \mu mol^{-1}$<br>$Kr^{Lig} = 0.0302 s^{-1}$ | this work |

**Table S4.** “CLEC-2 clustering” module: receptor clustering description (rapid-receptor dimerisation).

| Name                        | Reaction                       | Equation                                                       | Parameters (ligand-mediated dimerisation)                                                                                                 | Parameters (post-ligation dimerisation)                                                                            | Ref. |
|-----------------------------|--------------------------------|----------------------------------------------------------------|-------------------------------------------------------------------------------------------------------------------------------------------|--------------------------------------------------------------------------------------------------------------------|------|
| <i>Non-clustered CLEC-2</i> | $R^* \rightleftharpoons R_C^*$ | $\frac{dR^*}{dt} = -k_1 R_C R^* - 2k_2 R^* R^* + k_{-1} R_C S$ | $k_1 = 12324.611 s^{-1} \times \mu mol^{-1}$<br>$k_{-1} = 0.0116 s^{-1} \times \mu mol^{-1}$<br>$k_2 = 985236 s^{-1} \times \mu mol^{-1}$ | $k_1 = 619.65 s^{-1} \times \mu mol^{-1}$<br>$k_{-1} = 0.00205 s^{-1}$<br>$k_2 = 8.496 s^{-1} \times \mu mol^{-1}$ | (13) |
| <i>Clustered CLEC-2</i>     |                                | $\frac{dR_C^*}{dt} = k_2 R^* R^* - k_{-2} R_C R_C + k_3 R_C$   | $k_{-2} = 348.26 s^{-1} \times \mu mol^{-1}$<br>$k_3 = 2.7 \times 10^{-6} s^{-1}$                                                         | $k_{-2} = 0.00017 s^{-1} \times \mu mol^{-1}$<br>$k_3 = 0.0106 s^{-1}$                                             |      |

**Table S5.** “Tyrosine kinase” and “Quiescent state” module: initial conditions.

| Compartment          | Species                                     | Variable | Value | Ref. |
|----------------------|---------------------------------------------|----------|-------|------|
| PM                   | Non-active SFK (Y527 phosphorylated)        | $F_P$    | 36800 | (22) |
|                      | 1/3 active SFK                              | $F$      |       |      |
|                      | 2/3 active SFK (Y416 phosphorylated)        | $F^P$    |       |      |
|                      | Active SFK (Y416 phosphorylated, SH2 bound) | $F_*^P$  | 3600  |      |
|                      | Non-active CD148                            | $D$      |       |      |
| Active CD148 (Y1311) | $D^*$                                       |          |       |      |
| Cytosol              | Non-active Csk                              | $C_S$    | 11500 |      |
|                      | Active Csk                                  | $C_S^*$  |       |      |
|                      | Non-active Syk                              | $S$      | 5000  |      |
|                      | Active Syk (Y346 or Y525 phosphorylated)    | $S^*$    |       |      |
|                      | Non-active TULA-2                           | $T$      | 8000  |      |
|                      | Active TULA-2                               | $T^*$    |       |      |

**Table S6.** “Tyrosine kinase” and “Quiescent state” module: equations and parameters.

| Name                     | Reaction                             | Equation                                                                                                                                                                                                                                                                                                                             | Parameters                                                                          | Ref.         |
|--------------------------|--------------------------------------|--------------------------------------------------------------------------------------------------------------------------------------------------------------------------------------------------------------------------------------------------------------------------------------------------------------------------------------|-------------------------------------------------------------------------------------|--------------|
| <i>CD 148 activation</i> | $K_1$ $D \rightleftharpoons D^*$     | $S_{PM} \times \left( \frac{\left( \frac{F \times S_{PM} \times k_{cat}^{Src}}{V_{JM}} + \frac{F^P \times S_{PM} \times 2 \times k_{cat}^{Src}}{V_{JM}} + \frac{F_*^P \times S_{PM} \times k_{cat}^{Src}}{V_{JM}} \right)}{K_m^{Src} + \frac{D \times S_{PM}}{V_{JM}}} \right) \times D - S_{PM} \times Kr^{CD148} \times D^*$       | $k_{cat}^{Src} = 2.1 s^{-1}$<br>$K_m^{Src} = 3 \mu M$<br>$Kr^{CD148} = 90.8 s^{-1}$ | (4, 23)<br>* |
| <i>Csk activation</i>    | $K_2$ $C_S \rightleftharpoons C_S^*$ | $S_{PM} \times \left( \frac{\left( \frac{F \times S_{PM} \times k_{cat}^{Src}}{V_{JM}} + \frac{F^P \times S_{PM} \times 2 \times k_{cat}^{Src}}{V_{JM}} + \frac{F_*^P \times S_{PM} \times k_{cat}^{Src}}{V_{JM}} \right)}{K_m^{Src} + \frac{C_S \times S_{PM}}{V_{JM}}} \right) \times C_S - S_{PM} \times Kr^{CD148} \times C_S^*$ | $k_{cat}^{Src} = 2.1 s^{-1}$<br>$K_m^{Src} = 3 \mu M$<br>$Kr^{Csk} = 1.0 s^{-1}$    | (4, 23)<br>* |
| <i>SFK activation 1</i>  | $K_3$ $F_P \rightleftharpoons F$     | $S_{PM} \times \left( \frac{\frac{D^* \times S_{PM} \times k_{cat}^{CD148}}{V_{JM}}}{K_m^{CD148} + \frac{F_P \times S_{PM}}{V_{JM}}} \right) \times F_P - S_{PM} \times \left( \frac{\frac{C_S^* \times S_{PM} \times k_{cat}^{Csk}}{V_{JM}}}{K_m^{Csk} + \frac{F \times S_{PM}}{V_{JM}}} \right) \times F$                          | $k_{cat}^{CD148} = 9.7 s^{-1}$<br>$K_m^{CD148} = 9.1 mM$                            | (24)         |
|                          |                                      |                                                                                                                                                                                                                                                                                                                                      | $k_{cat}^{Csk} = 1.9 s^{-1}$<br>$K_m^{Csk} = 10 \mu M$                              |              |
|                          | $K_4$ $F \rightleftharpoons F^P$     |                                                                                                                                                                                                                                                                                                                                      | $k_{cat}^{Src} = 2.1 s^{-1}$<br>$K_m^{Src} = 3 \mu M$                               | (4, 23)      |

|                        |       |                                  |                                                                                                                                                                                                                                                                                                                                                                                                                           |                                                                                                                                                                                                                                                                                                                          |              |   |
|------------------------|-------|----------------------------------|---------------------------------------------------------------------------------------------------------------------------------------------------------------------------------------------------------------------------------------------------------------------------------------------------------------------------------------------------------------------------------------------------------------------------|--------------------------------------------------------------------------------------------------------------------------------------------------------------------------------------------------------------------------------------------------------------------------------------------------------------------------|--------------|---|
| SFK activation 2       |       |                                  | $S_{PM} \times \left( \frac{\left( \frac{F \times S_{PM} \times k_{cat}^{Src} / 3 + F^P \times S_{PM} \times 2 \times k_{cat}^{Src} / 3 + F^P \times S_{PM} \times k_{cat}^{Src}}{V_{JM}} \right)}{Km^{Src} + \frac{F \times S_{PM}}{V_{JM}}} \right) \times F$ $- S_{PM} \times \left( \frac{\frac{D^* \times S_{PM} \times k_{cat}^{CD148}}{V_{JM}}}{Km^{CD148} + \frac{F^P \times S_{PM}}{V_{JM}}} \right) \times F^P$ | $k_{cat}^{CD148} = 9.7 \text{ s}^{-1}$<br>$Km^{CD148} = 9.1 \text{ mM}$                                                                                                                                                                                                                                                  | (24)         |   |
| SFK activation 3       | $K_5$ | $F^P \rightleftharpoons F_p^*$   | $S_{PM} \times s \times k_{SF1}^{SH2} \times 2 \times R_p^* \times F^P - S_{PM} \times kD_{SFK}^{SH2} \times k_{SF1}^{SH2} \times F_p^*$                                                                                                                                                                                                                                                                                  | $s - \text{average cluster size}$<br>$k_{SF1}^{SH2} = 0.6 \mu\text{m}^2 \times \text{s}^{-1} \times \mu\text{mol}^{-1}$<br>$kD_{SFK}^{SH2} = 10^{-6} \mu\text{mol} / \mu\text{m}^2 \times \text{s}^{-1}$                                                                                                                 | (25)         | * |
| TULA-2 activation      | $K_6$ | $T \rightleftharpoons T^*$       | $V_{Cyt} \times Kf_{Syk}^{TULA-2} \times S^* \times T - V_{Cyt} \times Kr_{Syk}^{TULA-2} \times T^*$                                                                                                                                                                                                                                                                                                                      | $Kf_{Syk}^{TULA2} = 0.1 \mu\text{M}^{-1} \times \text{s}^{-1}$<br>$Kr_{Syk}^{TULA2} = 0.007 \text{ s}^{-1}$                                                                                                                                                                                                              | *            |   |
| CLEC-2 phosphorylation | $K_7$ | $R_C^* \rightleftharpoons R_p^*$ | $S_{PM} \times \left( \frac{S^* \times k_{cat}^{Syk}}{Km^{Syk} + \frac{R_C^* \times S_{PM}}{V_{JM}}} \right) \times R_C^* - S_{PM} \times Kr^{Phosph} \times R_p^*$                                                                                                                                                                                                                                                       | $k_{cat}^{Syk} = 11.85 \text{ s}^{-1}$<br>$Km^{Syk} = 9.1 \mu\text{M}$<br>$Kr^{Phosph} = 0.21 \text{ s}^{-1}$                                                                                                                                                                                                            | (26)         | * |
| Syk activation         | $K_8$ | $S \rightleftharpoons S^*$       | $V_{Cyt} \times \frac{s \times k_{S1}^{SH2} \times S_{PM} \times R_p^*}{V_{JM}} \times \left( \frac{S^* \times k_{cat}^{Syk}}{Km^{Syk} + \frac{S \times S_{PM}}{V_{JM}}} \right) \times S$ $- V_{Cyt} \times \left( kD_{Syk}^{SH2} \times k_{S1}^{SH2} + Kr^{Syk} + Kr_{TULA2}^{Syk} \times T^* \right) \times S^*$                                                                                                       | $s - \text{average cluster size}$<br>$k_{S1}^{SH2} = 0.47 \text{ s}^{-1} \times \mu\text{M}^{-1}$<br>$k_{cat}^{Syk} = 11.85 \text{ s}^{-1}$<br>$Km^{Syk} = 9.1 \mu\text{M}$<br>$kD_{Syk}^{SH2} = 0.176 \mu\text{M}$<br>$Kr^{Syk} = 10 \text{ s}^{-1}$<br>$Kr_{TULA2}^{Syk} = 7.5 \text{ s}^{-1} \times \mu\text{M}^{-1}$ | (26)<br>(27) | * |

**Table S7.** “LAT-PLCy2” module: initial conditions.

| Compartment  | Species                   | Variable | Value   | Ref. |
|--------------|---------------------------|----------|---------|------|
| PM           | LAT                       | $L$      | 4900    | (22) |
|              | Phosphorylated LAT        | $L^*$    |         |      |
|              | LAT-PLCy2 complexes       | $Lp$     |         |      |
|              | LAT-PLCy2- PI3K complexes | $LP$     |         |      |
|              | PIP <sub>2</sub>          | $I_1$    | 200 μM  | (19) |
|              | PIP <sub>3</sub>          | $I_2$    |         |      |
|              | Active Btk                | $B^*$    | 0       | (22) |
| Active PLCy2 | $p^*$                     |          |         |      |
| Cytosol      | Non-active PI3K           | $P$      | 1900    |      |
|              | Non-active PLCy2          | $p$      | 2000    |      |
|              | Non-active Btk            | $B$      | 11100   |      |
|              | IP <sub>3</sub>           | $I_3$    | 0.05 nM | (19) |

**Table S8.** “LAT-PLCy2” module: equations and parameters.

| Name           | Reaction | Equation                   | Parameters                                                             | Ref.    |
|----------------|----------|----------------------------|------------------------------------------------------------------------|---------|
| LAT phosphoryl | $PL_1$   | $L \rightleftharpoons L^*$ | $k_{cat}^{Syk} = 11.85 \text{ s}^{-1}$<br>$Km^{Syk} = 9.1 \mu\text{M}$ | (4, 23) |

|                                  |        |                              |                                                                                                                                                                          |                                                                                                  |              |
|----------------------------------|--------|------------------------------|--------------------------------------------------------------------------------------------------------------------------------------------------------------------------|--------------------------------------------------------------------------------------------------|--------------|
| action by Syk                    |        |                              | $S_{PM} \times \left( \frac{s^* \times k_{cat}^{Syk}}{Km^{Syk} + \frac{L \times S_{PM}}{V_{JM}}} \right) \times L - S_{PM} \times Kr^{LAT} \times (L^* + Lp + LP + p^*)$ | $Kr^{LAT} = 1.41 s^{-1}$                                                                         | *            |
| LAT-PLCy2 complex formation      | $PL_2$ | $p \rightleftharpoons Lp$    | $S_{PM} \times k_1^{Lp} \times L^* \times p - S_{PM} \times kD_{Lp} \times k_1^{Lp} \times (Lp + LP + p^*)$                                                              | $k_1^{Lp} = 0.9 \mu M^{-1} \times s^{-1}$<br>$kD_{Lp} = 0.15 \mu M$                              | (25)<br>*    |
| LAT-PLCy2-PI3K complex formation | $PL_3$ | $P \rightleftharpoons LP$    | $S_{PM} \times k_1^{LP} \times Lp \times P - S_{PM} \times kD_{LP} \times k_1^{LP} \times LP$                                                                            | $k_1^{LP} = 4.2 \mu M^{-1} \times s^{-1}$<br>$kD_{LP} = 0.22 \mu M$                              | (25)<br>*    |
| PIP <sub>3</sub> production      | $PL_4$ | $I_1 \rightleftharpoons I_2$ | $S_{PM} \times \left( \frac{LP \times S_{PM} \times k_{cat}^{PI3K}}{V_{JM}} \right) \times I_1 - S_{PM} \times Kr^{PIP_3} \times (I_2 + B^*)$                            | $k_{cat}^{PI3K} = 2.82 s^{-1}$<br>$Km^{PI3K} = 11 \mu M$<br>$Kr^{PIP_3} = 0.44 s^{-1}$           | (19)<br>*    |
| Btk activation                   | $PL_5$ | $B \rightleftharpoons B^*$   | $S_{PM} \times k_1^{B^I} \times I_2 \times B - S_{PM} \times kD_{B^I} \times k_1^{B^I} \times B^*$                                                                       | $k_1^{B^I} = 0.51 \mu M^{-1} \times s^{-1}$<br>$kD_{B^I} = 0.64 \mu M$                           | (25)<br>*    |
| PLCy2 activation                 | $PL_6$ | $Lp \rightleftharpoons p^*$  | $S_{PM} \times \left( \frac{B^* \times S_{PM} \times k_{cat}^{Btk}}{V_{JM}} \right) \times Lp - S_{PM} \times Kr^{PLC} \times p^*$                                       | $k_{cat}^{Btk} = 0.14 s^{-1}$<br>$Km^{Btk} = 37 \mu M$<br>$Kr^{PLC} = 8.6 \times 10^{-3} s^{-1}$ | (4, 28)<br>* |
| IP <sub>3</sub> production       | $PL_7$ | $I_1 \rightleftharpoons I_3$ | $S_{PM} \times \left( \frac{p^* \times S_{PM} \times k_{cat}^{PLCy2} \times (Ca)}{V_{JM}} \right) \times I_1 - V_{Cyt} \times Kr^{IP_3} \times I_3$                      | $k_{cat}^{PLCy2} = 30.5 s^{-1}$<br>$Km^{PLCy2} = 0.78 \mu M$<br>$Kr^{IP_3} = 60 s^{-1}$          | *<br>*       |

Detailed calcium module description is given in (19).

**Table S9.** Models in COPASI Software.

|                                                                                              |                      |
|----------------------------------------------------------------------------------------------|----------------------|
| Model of platelet CLEC-2 induced activation with rapid, ligand-induced receptor dimerisation | CLEC2_rapidclust.xml |
| Model of platelet CLEC-2 induced activation with post-ligation receptor dimerisation         | CLEC2_altclust.xml   |

**Table S10.** Sensitivity scores of the most influential parameters for the number of active Syk kinases at the point of maximal activation.

| Module                     | Parameter name                                     | Variable        | Value                                  | Variation limits | Sensitivity Score |
|----------------------------|----------------------------------------------------|-----------------|----------------------------------------|------------------|-------------------|
| "CLEC-2 clustering" module | CLEC-2 clustering: $k_{-2}$                        | $k_{-2}$        | $348.26 s^{-1} \times \mu mol^{-1}$    | 25 – 250         | 0.077             |
|                            | CLEC-2 clustering: $k_{-1}$                        | $k_{-1}$        | $0.0116 s^{-1} \times \mu mol^{-1}$    | 0.001 – 0.01     | 0.044             |
|                            | CLEC-2 clustering: $k_1$                           | $k_1$           | $12324.611 s^{-1} \times \mu mol^{-1}$ | 5000 – 50000     | 0.014             |
| "Tyrosine kinase" module   | the forward rate of Syk activation by SH-2 domains | $k_{S1}^{SH2}$  | $0.47 s^{-1} \times \mu M^{-1}$        | 0.2 – 2          | 1.21245           |
|                            | reverse rate of CLEC-2 phosphorylation             | $Kr^{Phosph}$   | $0.21 s^{-1}$                          | 0.05 - 0.5       | 1.10722           |
|                            | the turnover rate of Syk kinases                   | $k_{cat}^{Syk}$ | $11.85 s^{-1}$                         | 5 – 15           | 1.10362           |
|                            | Michaelis constant of Syk kinases                  | $Km^{Syk}$      | $9.1 \mu M$                            | 5 – 15           | 0.997198          |

|             |                                               |                    |                                |               |          |
|-------------|-----------------------------------------------|--------------------|--------------------------------|---------------|----------|
|             | reverse rate of Syk activation by SFK kinases | $Kr^{Syk}$         | $10 s^{-1}$                    | 5 – 25        | 0.775836 |
|             | Syk deactivation by TULA-2 rate               | $Kr_{TULA2}^{Syk}$ | $7.5 s^{-1} \times \mu M^{-1}$ | 2 – 20        | 0.734043 |
|             | the forward rate of TULA-2 activation by Syk  | $Kf_{Syk}^{TULA2}$ | $0.1 \mu M^{-1} \times s^{-1}$ | 0.05 - 0.5    | 0.559938 |
|             | reverse rate of TULA-2 activation by Syk      | $Kr_{Syk}^{TULA2}$ | $0.007 s^{-1}$                 | 0.01 - 0.1    | 0.21001  |
|             | the turnover rate of SFK kinases              | $k_{cat}^{Src}$    | $2.1 s^{-1}$                   | 0.5 – 5       | 0.17258  |
|             | Michaelis constant of CD148                   | $Km^{CD148}$       | $9.1 mM$                       | 4550 - 18200  | 0.010652 |
|             | reverse rate of CD148 activation              | $Kr^{CD148}$       | $90.8 s^{-1}$                  | 40 - 200      | 0.010623 |
|             | the turnover rate of CD148                    | $k_{cat}^{CD148}$  | $9.7 s^{-1}$                   | 4 - 20        | 0.010536 |
|             | Syk initial number                            | $S$                | 5000                           | 2500 - 10000  | 1.46352  |
|             | TULA-2 initial number                         | $T$                | 8000                           | 3750 - 15000  | 0.680195 |
|             | SFK initial number                            | $F_P$              | 36800                          | 10000 - 40000 | 0.010381 |
| Comp. Sizes | platelet cytosol volume                       | $V_{Cyt}$          | $4.5 fl$                       | 2.25 – 9      | 1        |
|             | plasma membrane area                          | $S_{PM}$           | $45 \mu m^2$                   | 25 - 90       | 0.152712 |

**Table S11.** Sensitivity scores of the most influential parameters for the number of phosphorylated LAT at the point of maximal activation.

| Module                     | Parameter name                                     | Variable        | Value                                  | Variation limits | Sensitivity Score |
|----------------------------|----------------------------------------------------|-----------------|----------------------------------------|------------------|-------------------|
| “CLEC-2 clustering” module | CLEC-2 clustering: $k_{-2}$                        | $k_{-2}$        | $348.26 s^{-1} \times \mu mol^{-1}$    | 25 – 250         | 0.080092          |
|                            | CLEC-2 clustering: $k_{-1}$                        | $k_{-1}$        | $0.0116 s^{-1} \times \mu mol^{-1}$    | 0.001 – 0.01     | 0.035984          |
|                            | CLEC-2 clustering: $k_1$                           | $k_1$           | $12324.611 s^{-1} \times \mu mol^{-1}$ | 5000 – 50000     | 0.01352           |
|                            | CLEC-2 initial number                              | $R$             | 2000                                   | 1000-4000        | 0.061893          |
| “Tyrosine kinase” module   | turnover rate of Syk kinases                       | $k_{cat}^{Syk}$ | $11.85 s^{-1}$                         | 5 – 15           | 2.34692           |
|                            | Michaelis constant of Syk kinases                  | $Km^{Syk}$      | $9.1 \mu M$                            | 5 – 15           | 1.71089           |
|                            | the forward rate of Syk activation by SH-2 domains | $k_{S1}^{SH2}$  | $0.47 s^{-1} \times \mu M^{-1}$        | 0.2 – 2          | 1.53089           |
|                            | reverse rate of Syk activation by SFK kinases      | $Kr^{Syk}$      | $10 s^{-1}$                            | 5 – 25           | 1.37626           |
|                            | reverse rate of CLEC-2 phosphorylation             | $Kr^{Phosph}$   | $0.21 s^{-1}$                          | 0.05 - 0.5       | 1.07892           |

|                             |                                              |                    |                                |              |          |
|-----------------------------|----------------------------------------------|--------------------|--------------------------------|--------------|----------|
|                             | Syk deactivation by TULA-2 rate              | $Kr_{TULA2}^{Syk}$ | $7.5 s^{-1} \times \mu M^{-1}$ | 2 – 20       | 0.531341 |
|                             | the forward rate of TULA-2 activation by Syk | $Kf_{Syk}^{TULA2}$ | $0.1 \mu M^{-1} \times s^{-1}$ | 0.05 - 0.5   | 0.348428 |
|                             | the turnover rate of SFK kinases             | $k_{cat}^{Src}$    | $2.1 s^{-1}$                   | 0.5-5        | 0.136494 |
|                             | reverse rate of TULA-2 activation by Syk     | $Kr_{Syk}^{TULA2}$ | $0.007 s^{-1}$                 | 0.01 - 0.1   | 0.05687  |
|                             | Syk SH-2 domains kD                          | $kD_{Syk}^{SH2}$   | $0.176 \mu M$                  | 0.05-0.5     | 0.011793 |
|                             | Syk initial number                           | $S$                | 5000                           | 2500 - 10000 | 1.91275  |
|                             | TULA-2 initial number                        | $T$                | 8000                           | 3750 - 15000 | 0.369641 |
| “LAT-PLC $\gamma$ 2” module | reverse rate of LAT phosphorylation          | $Kr^{LAT}$         | $1.41 s^{-1}$                  | 0.25 - 2.5   | 0.983638 |
|                             | LAT initial number                           | $L$                | 4900                           | 2500 - 10000 | 0.544366 |
| Comp. Sizes                 | plasma membrane area                         | $S_{PM}$           | $45 \mu m^2$                   | 25 - 90      | 0.39402  |

**Table S12.** Sensitivity scores of the most influential parameters for the number of active PLC $\gamma$ 2 at point of maximal activation.

| Module                     | Parameter name                                     | Variable           | Value                                  | Variation limits | Sensitivity Score |
|----------------------------|----------------------------------------------------|--------------------|----------------------------------------|------------------|-------------------|
| “CLEC-2 clustering” module | CLEC-2 clustering: $k_{-2}$                        | $k_{-2}$           | $348.26 s^{-1} \times \mu mol^{-1}$    | 25 – 250         | 0.129158          |
|                            | CLEC-2 clustering: $k_{-1}$                        | $k_{-1}$           | $0.0116 s^{-1} \times \mu mol^{-1}$    | 0.001 – 0.01     | 0.062745          |
|                            | CLEC-2 clustering: $k_1$                           | $k_1$              | $12324.611 s^{-1} \times \mu mol^{-1}$ | 5000 – 50000     | 0.021921          |
|                            | CLEC-2 clustering: $k_3$                           | $k_3$              | $2.7 \times 10^{-6} s^{-1}$            | 0.0001 – 0.001   | 0.011867          |
|                            | CLEC-2 initial number                              | $R$                | 2000                                   | 1000-4000        | 0.08554           |
| “Tyrosine kinase” module   | turnover rate of Syk kinases                       | $k_{cat}^{Syk}$    | $11.85 s^{-1}$                         | 5 – 15           | 3.86148           |
|                            | Michaelis constant of Syk kinases                  | $Km^{Syk}$         | $9.1 \mu M$                            | 5 – 15           | 2.8085            |
|                            | the forward rate of Syk activation by SH-2 domains | $k_{S1}^{SH2}$     | $0.47 s^{-1} \times \mu M^{-1}$        | 0.2 – 2          | 2.38768           |
|                            | reverse rate of Syk activation by SFK kinases      | $Kr^{Syk}$         | $10 s^{-1}$                            | 5 – 25           | 2.0621            |
|                            | reverse rate of CLEC-2 phosphorylation             | $Kr^{Phosph}$      | $0.21 s^{-1}$                          | 0.05 - 0.5       | 1.78911           |
|                            | Syk deactivation by TULA-2 rate                    | $Kr_{TULA2}^{Syk}$ | $7.5 s^{-1} \times \mu M^{-1}$         | 2 – 20           | 0.993338          |
|                            | the forward rate of TULA-2 activation by Syk       | $Kf_{Syk}^{TULA2}$ | $0.1 \mu M^{-1} \times s^{-1}$         | 0.05 - 0.5       | 0.681899          |
|                            | the turnover rate of SFK kinases                   | $k_{cat}^{Src}$    | $2.1 s^{-1}$                           | 0.5-5            | 0.262073          |



|                             |                                                          |                    |                                 |              |           |
|-----------------------------|----------------------------------------------------------|--------------------|---------------------------------|--------------|-----------|
|                             | reverse rate of TULA-2 activation by Syk                 | $Kr_{Syk}^{TULA2}$ | $0.007 s^{-1}$                  | 0.01 - 0.1   | 0.16055   |
|                             | Syk SH-2 domains kD                                      | $kD_{Syk}^{SH2}$   | $0.176 \mu M$                   | 0.05-0.5     | 0.0173905 |
|                             | Syk initial number                                       | $S$                | 5000                            | 2500 - 10000 | 3.00666   |
|                             | TULA-2 initial number                                    | $T$                | 8000                            | 3750 - 15000 | 0.765108  |
| "LAT-PLC $\gamma$ 2" module | reverse rate of LAT phosphorylation                      | $Kr^{LAT}$         | $1.41 s^{-1}$                   | 0.25 - 2.5   | 1.6537    |
|                             | the turnover rate of Btk                                 | $k_{cat}^{Btk}$    | $0.14 s^{-1}$                   | 0.07 - 0.28  | 0.795997  |
|                             | Michaelis constant of Btk                                | $Km^{Btk}$         | $37 \mu M$                      | 18 - 74      | 0.793626  |
|                             | the turnover rate of PI3K                                | $k_{cat}^{PI3K}$   | $2.82 s^{-1}$                   | 1.4 - 5.65   | 0.70601   |
|                             | reverse rate of PIP $_3$ production by PI3K              | $Kr^{PIP_3}$       | $0.44 s^{-1}$                   | 0.2 - 0.9    | 0.691281  |
|                             | reverse rate of PLC $\gamma$ 2 activation                | $Kr^{PLC}$         | $8.6 \times 10^{-3} s^{-1}$     | 0.005 - 0.05 | 0.260846  |
|                             | PLC $\gamma$ 2 kD from phosphorylated LAT                | $kD_{LP}$          | $0.15 \mu M$                    | 0.075 - 0.3  | 0.146303  |
|                             | Michaelis constant of PI3K                               | $Km^{PI3K}$        | $11 \mu M$                      | 5.5 - 22     | 0.0369431 |
|                             | the forward rate of Btk activation upon PIP $_3$ binding | $k_1^{Bl}$         | $0.51 \mu M^{-1} \times s^{-1}$ | 0.25 - 1     | 0.0113054 |
|                             | PI3K kD from phosphorylated LAT                          | $kD_{LP}$          | $0.22 \mu M$                    | 0.11 - 0.44  | 0.0108299 |
|                             | LAT initial number                                       | $L$                | 4900                            | 2500 - 10000 | 0.912258  |
|                             | Btk initial number                                       | $B$                | 11100                           | 5000 - 25000 | 0.796234  |
|                             | PLC $\gamma$ 2 initial number                            | $p$                | 2000                            | 1000 - 4000  | 0.152649  |
|                             | PI3K initial number                                      | $P$                | 1900                            | 950 - 3800   | 0.0115858 |
| Comp. Sizes                 | plasma membrane area                                     | $S_{PM}$           | $45 \mu m^2$                    | 25 - 90      | 0.73603   |

**Table S13.** Sensitivity scores of the most influential parameters for the IP $_3$  concentration at the point of maximal activation.

| Module                     | Parameter name               | Variable        | Value                                  | Variation limits | Sensitivity Score |
|----------------------------|------------------------------|-----------------|----------------------------------------|------------------|-------------------|
| "CLEC-2 clustering" module | CLEC-2 clustering: $k_{-2}$  | $k_{-2}$        | $348.26 s^{-1} \times \mu mol^{-1}$    | 25 - 250         | 0.190352          |
|                            | CLEC-2 clustering: $k_{-1}$  | $k_{-1}$        | $0.0116 s^{-1} \times \mu mol^{-1}$    | 0.001 - 0.01     | 0.092191          |
|                            | CLEC-2 clustering: $k_1$     | $k_1$           | $12324.611 s^{-1} \times \mu mol^{-1}$ | 5000 - 50000     | 0.032406          |
|                            | CLEC-2 clustering: $k_3$     | $k_3$           | $2.7 \times 10^{-6} s^{-1}$            | 0.0001 - 0.001   | 0.0175            |
|                            | CLEC-2 initial number        | $R$             | 2000                                   | 1000-4000        | 0.126508          |
|                            | turnover rate of Syk kinases | $k_{cat}^{Syk}$ | $11.85 s^{-1}$                         | 5 - 15           | 5.71225           |

|                             |                                                          |                    |                                 |               |          |
|-----------------------------|----------------------------------------------------------|--------------------|---------------------------------|---------------|----------|
| "Tyrosine kinase" module    | Michaelis constant of Syk kinases                        | $Km^{Syk}$         | $9.1 \mu M$                     | 5 – 15        | 4.12844  |
|                             | the forward rate of Syk activation by SH-2 domains       | $k_{S1}^{SH2}$     | $0.47 s^{-1} \times \mu M^{-1}$ | 0.2 – 2       | 3.52858  |
|                             | reverse rate of Syk activation by SFK kinases            | $Kr^{Syk}$         | $10 s^{-1}$                     | 5 – 25        | 3.03843  |
|                             | reverse rate of CLEC-2 phosphorylation                   | $Kr^{Phosph}$      | $0.21 s^{-1}$                   | 0.05 - 0.5    | 2.6302   |
|                             | Syk deactivation by TULA-2 rate                          | $Kr_{TULA2}^{Syk}$ | $7.5 s^{-1} \times \mu M^{-1}$  | 2 – 20        | 1.45979  |
|                             | the forward rate of TULA-2 activation by Syk             | $Kf_{Syk}^{TULA2}$ | $0.1 \mu M^{-1} \times s^{-1}$  | 0.05 - 0.5    | 1.00145  |
|                             | the turnover rate of SFK kinases                         | $k_{cat}^{Src}$    | $2.1 s^{-1}$                    | 0.5-5         | 0.386137 |
|                             | reverse rate of TULA-2 activation by Syk                 | $Kr_{Syk}^{TULA2}$ | $0.007 s^{-1}$                  | 0.01 - 0.1    | 0.235098 |
|                             | Syk SH-2 domains kD                                      | $kD_{Syk}^{SH2}$   | $0.176 \mu M$                   | 0.05-0.5      | 0.025556 |
|                             | reverse rate of CD148 activation                         | $Kr^{CD148}$       | $90.8 s^{-1}$                   | 40 - 200      | 0.011223 |
|                             | the turnover rate of CD148                               | $k_{cat}^{CD148}$  | $9.7 s^{-1}$                    | 4 - 20        | 0.010769 |
|                             | Michaelis constant of CD148                              | $Km^{CD148}$       | $9.1 mM$                        | 4550 - 18200  | 0.010616 |
|                             | Syk initial number                                       | $S$                | 5000                            | 2500 - 10000  | 4.44675  |
|                             | TULA-2 initial number                                    | $T$                | 8000                            | 3750 - 15000  | 1.12288  |
|                             | SFK initial number                                       | $F_p$              | 36800                           | 10000 - 40000 | 0.010622 |
| "LAT-PLC $\gamma$ 2" module | reverse rate of LAT phosphorylation                      | $Kr^{LAT}$         | $1.41 s^{-1}$                   | 0.25 - 2.5    | 2.43175  |
|                             | reverse rate of IP $_3$ production                       | $Kr^{IP_3}$        | $60 s^{-1}$                     | 20 – 100      | 1.47202  |
|                             | the turnover rate of Btk                                 | $k_{cat}^{Btk}$    | $0.14 s^{-1}$                   | 0.07 - 0.28   | 1.17565  |
|                             | Michaelis constant of Btk                                | $Km^{Btk}$         | $37 \mu M$                      | 18 - 74       | 1.17029  |
|                             | the turnover rate of PI3K                                | $k_{cat}^{PI3K}$   | $2.82 s^{-1}$                   | 1.4 - 5.65    | 1.03907  |
|                             | reverse rate of PIP $_3$ production by PI3K              | $Kr^{PIP_3}$       | $0.44 s^{-1}$                   | 0.2 - 0.9     | 1.01565  |
|                             | reverse rate of PLC $\gamma$ 2 activation                | $Kr^{PLC}$         | $8.6 \times 10^{-3} s^{-1}$     | 0.005 - 0.05  | 0.382328 |
|                             | PLC $\gamma$ 2 kD from phosphorylated LAT                | $kD_{Lp}$          | $0.15 \mu M$                    | 0.075 - 0.3   | 0.215728 |
|                             | Michaelis constant of PI3K                               | $Km^{PI3K}$        | $11 \mu M$                      | 5.5 - 22      | 0.054275 |
|                             | the forward rate of Btk activation upon PIP $_3$ binding | $k_1^{BI}$         | $0.51 \mu M^{-1} \times s^{-1}$ | 0.25 - 1      | 0.016936 |

|             |                                 |           |              |              |          |
|-------------|---------------------------------|-----------|--------------|--------------|----------|
|             | PI3K kD from phosphorylated LAT | $kD_{LP}$ | 0.22 $\mu M$ | 0.11 - 0.44  | 0.015487 |
|             | LAT initial number              | $L$       | 4900         | 2500 - 10000 | 1.3449   |
|             | Btk initial number              | $B$       | 11100        | 5000 - 25000 | 1.17598  |
|             | PLCy2 initial number            | $p$       | 2000         | 1000 - 4000  | 0.225426 |
|             | PI3K initial number             | $P$       | 1900         | 950 - 3800   | 0.016803 |
| Comp. Sizes | plasma membrane area            | $S_{PM}$  | 45 $\mu m^2$ | 25 - 90      | 2.70157  |

**Table S14.** Sensitivity scores of the most influential parameters for the calcium concentration at the point of maximal activation.

|                        | $k_1; s^{-1} \times \mu mol^{-1}$ | $k_{-2}; s^{-1} \times \mu mol^{-1}$ | $k_3; s^{-1}$        |
|------------------------|-----------------------------------|--------------------------------------|----------------------|
| 37°C                   | 13924.4                           | 348.26                               | $2.7 \times 10^{-6}$ |
| 25°C                   | 2249                              | 251.16                               | $1.8 \times 10^{-6}$ |
| 25°C, 1mM m $\beta$ CD | 164                               | 208.07                               | $1 \times 10^{-6}$   |

**Table S15.** "CLEC-2 clustering" module parameters, corresponding to different activatory conditions.

System of differential equations corresponding to the biochemical reactions incorporated in the stochastic model:

$$\frac{dLig}{dt} \times V_{EC} = -M_1 \quad (1)$$

$$\frac{dR}{dt} \times S_{PM} = -M_1 \quad (2)$$

$$\frac{dR^*}{dt} \times S_{PM} = M_1 + TS5_1 \quad (3)$$

$$\frac{dR_C^*}{dt} \times S_{PM} = TS5_2 - K_7 \quad (4)$$

$$\frac{dR_P^*}{dt} \times S_{PM} = K_7 \quad (5)$$

$$\frac{dD}{dt} \times S_{PM} = -K_1 \quad (6)$$

$$\frac{dD^*}{dt} \times S_{PM} = K_1 \quad (7)$$

$$\frac{dCs}{dt} \times V_{Cyt} = -K_2 \quad (8)$$

$$\frac{dCs^*}{dt} \times V_{Cyt} = K_2 \quad (9)$$

$$\frac{dF_P}{dt} \times S_{PM} = -K_3 \quad (10)$$

$$\frac{dF}{dt} \times S_{PM} = K_3 - K_4 \quad (11)$$

$$\frac{dF^P}{dt} \times S_{PM} = K_4 - K_5 \quad (12)$$

$$\frac{dF_*^P}{dt} \times S_{PM} = K_5 \quad (13)$$

$$\frac{dT}{dt} \times V_{Cyt} = -K_6 \quad (14)$$

$$\frac{dT^*}{dt} \times V_{Cyt} = K_6 \quad (15)$$

$$\frac{dS}{dt} \times V_{Cyt} = -K_8 \quad (16)$$

$$\frac{dS^*}{dt} \times V_{Cyt} = K_8 \quad (17)$$

$$\frac{dL}{dt} \times S_{PM} = -PL_1 \quad (18)$$

$$\frac{dL^*}{dt} \times S_{PM} = PL_1 \quad (19)$$

$$\frac{dLp}{dt} \times S_{PM} = PL_2 - PL_6 \quad (20)$$

$$\frac{dLP}{dt} \times S_{PM} = PL_3 \quad (21)$$

$$\frac{dp}{dt} \times V_{Cyt} = -PL_2 \quad (22)$$

$$\frac{dP}{dt} \times V_{Cyt} = -PL_3 \quad (23)$$

$$\frac{dI_1}{dt} \times S_{PM} = -PL_4 - PL_7 \quad (24)$$

$$\frac{dI_2}{dt} \times S_{PM} = PL_4 \quad (25)$$

$$\frac{dB}{dt} \times V_{Cyt} = -PL_5 \quad (26)$$

$$\frac{dB^*}{dt} \times S_{PM} = PL_5 \quad (27)$$

$$\frac{dp^*}{dt} \times S_{PM} = PL_6 \quad (28)$$

$$\frac{dI_3}{dt} \times V_{Cyt} = PL_7 \quad (29)$$

### 3. Supporting Figures

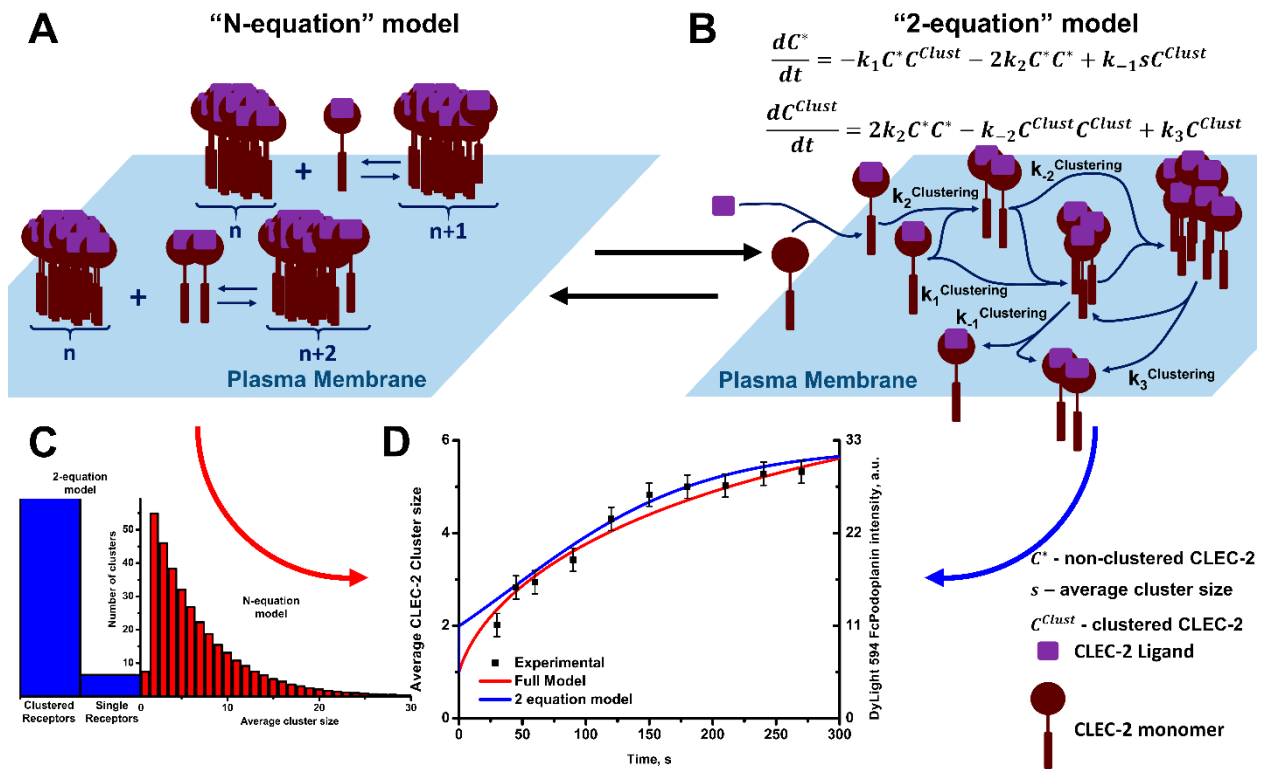

**Figure S1. CLEC-2 receptor clustering models.** In order to describe platelet CLEC-2 receptor clustering two approaches were used: N-equation model of receptor clustering, which describes behavior of the clusters of the receptors of each size explicitly (A – scheme, C- average cluster size) – (11) and 2-equation model, that describes behavior of the receptor clusters in general (B) – (13). Both models were capable of describing experimental data showing the clustering of CLEC-2, calculated from absolute fluorescent intensity data (12) under the assumption that only CLEC-2 monomers and dimers are present on the surface of resting platelets (29) (D). More simplistic approach – 2-equation model – was used for the construction of the complete model of CLEC-2 signalling, because it both allowed to describe experimental data and to reduce computational complexity.

## Extracellular

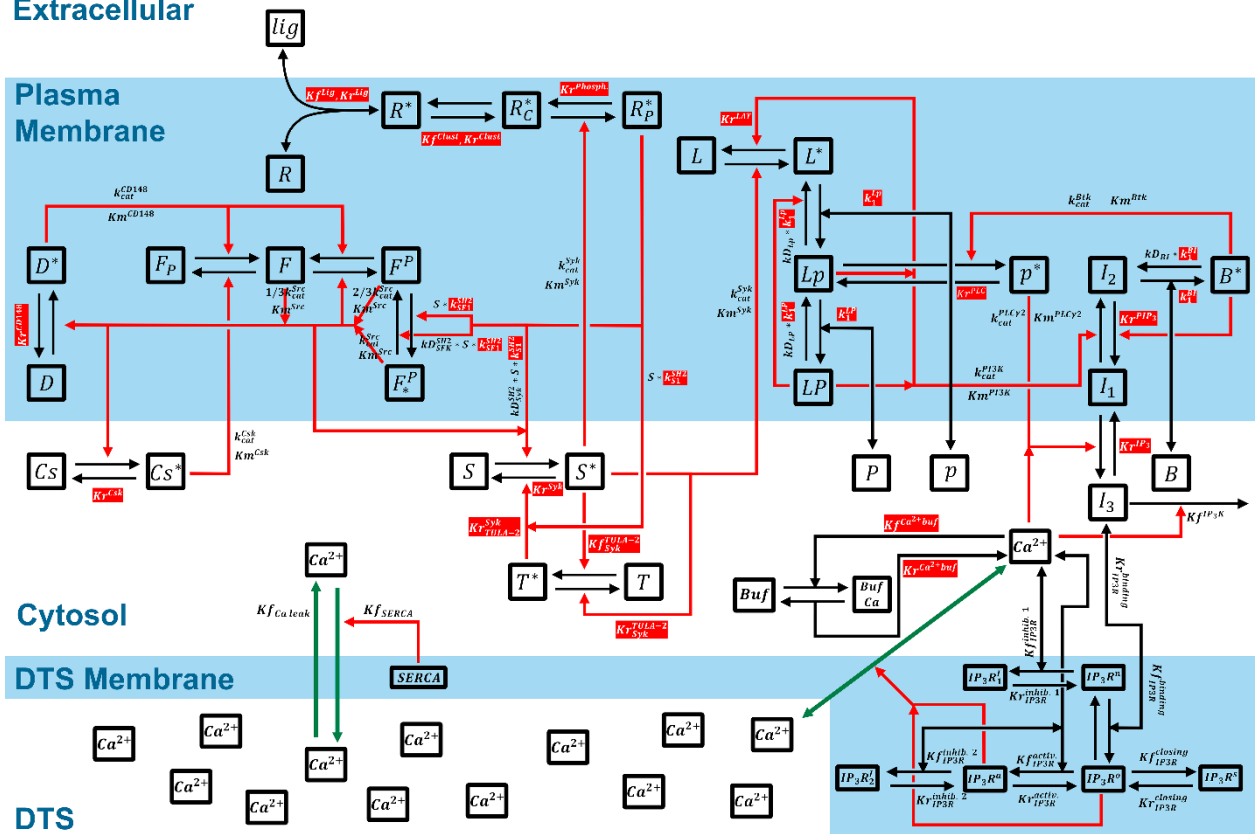

**Figure S2. Network diagram of the platelet CLEC-2 signalling model.** Black lines represent transitions between the different state of the incorporated species. Red lines represent catalysis. Green lines represent calcium ions transitions from DTS to the cytosol. Unknown parameter values are highlighted in red. All parameter values can be found in Supplementary Tables S4,5,7,9.

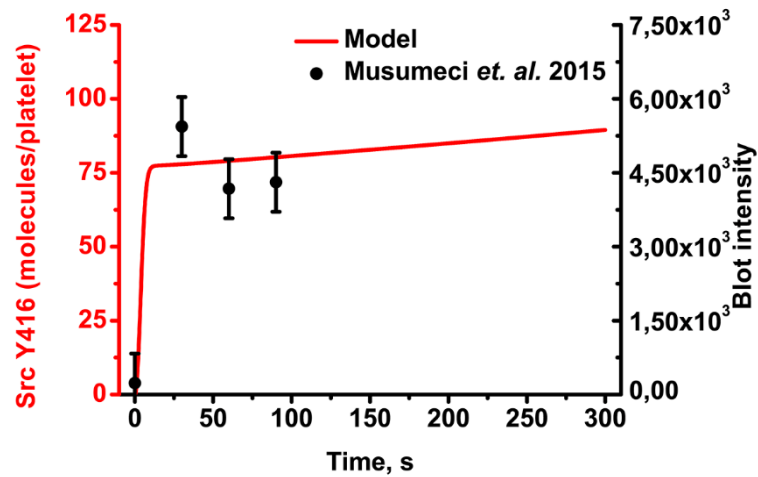

**Figure S3. Model validation.** Comparison of the numbers of Y416 phosphorylated amount of SFK predicted by the model to experimental data available from the literature (15).

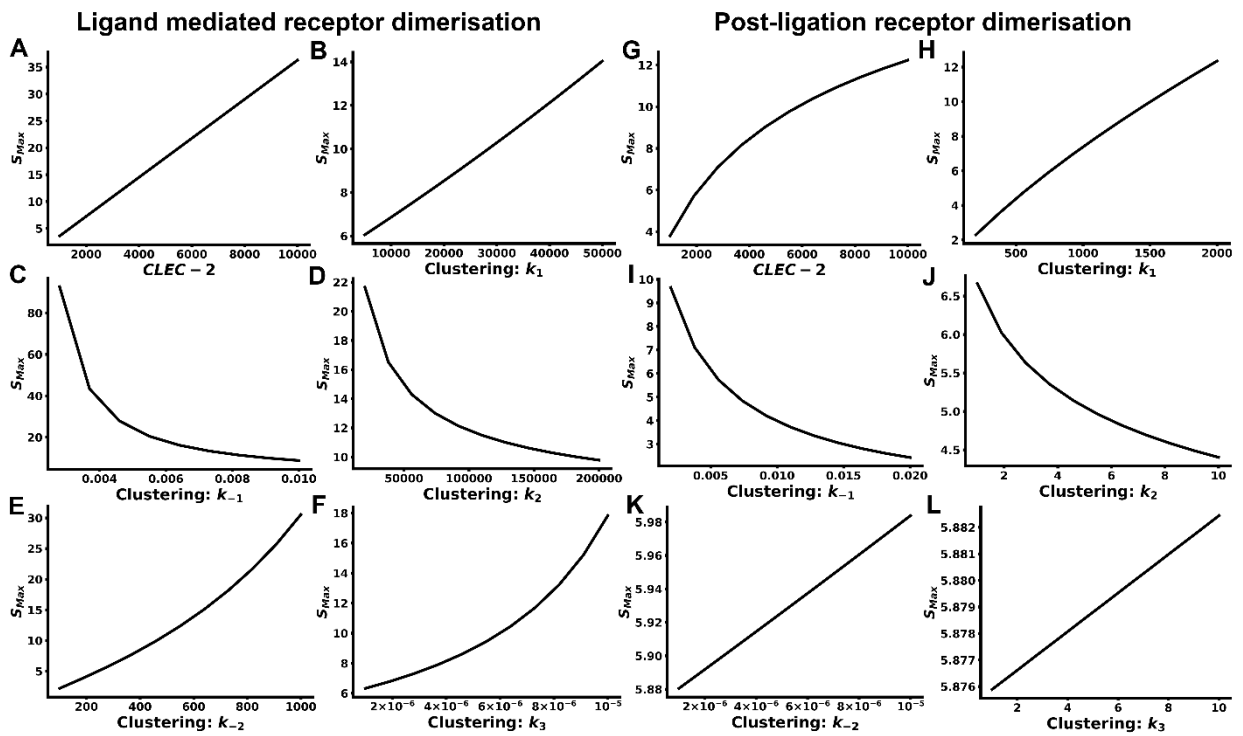

**Figure S4. Explicit variation of the parameters of the “CLEC-2 clustering module”.** (A-C) Impact of the “CLEC-2 clustering” parameters on maximal CLEC-2 cluster size ( $S_{Max}$ ) in “Ligand mediated receptor dimerisation” mode: CLEC-2 initial number (A), CLEC-2 clustering  $k_1$  (B), CLEC-2 clustering  $k_{-1}$  (C), CLEC-2 clustering  $k_2$  (D), CLEC-2 clustering  $k_{-2}$  (E), CLEC-2 clustering  $k_3$  (F). (G-L) Impact of the “CLEC-2 clustering” parameters on maximal CLEC-2 cluster size ( $S_{Max}$ ) in “Post-ligation receptor dimerisation” mode: CLEC-2 initial number (G), CLEC-2 clustering  $k_1$  (H), CLEC-2 clustering  $k_{-1}$  (I), CLEC-2 clustering  $k_2$  (J), CLEC-2 clustering  $k_{-2}$  (K), CLEC-2 clustering  $k_3$  (L).

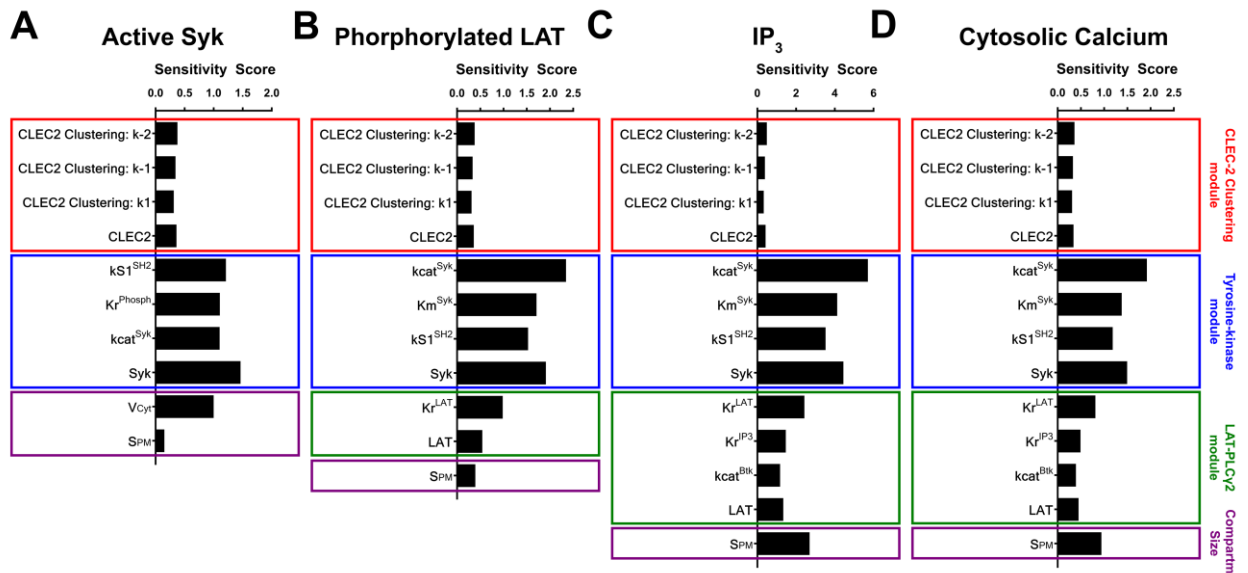

**Figure S5. Local sensitivity analysis.** Sensitivity score of the most influential parameters from each of the module and the most influential initial concentration, concerning: number of active Syk kinases (A), number of phosphorylated LAT (B),  $IP_3$  concentration (C), cytosolic calcium concentration (D). Red colour highlights “CLEC-2 clustering” module, blue – “Tyrosine-kinase” module, green – “LAT-PLC $\gamma$ 2” module, purple – initial volumes of the model compartments.

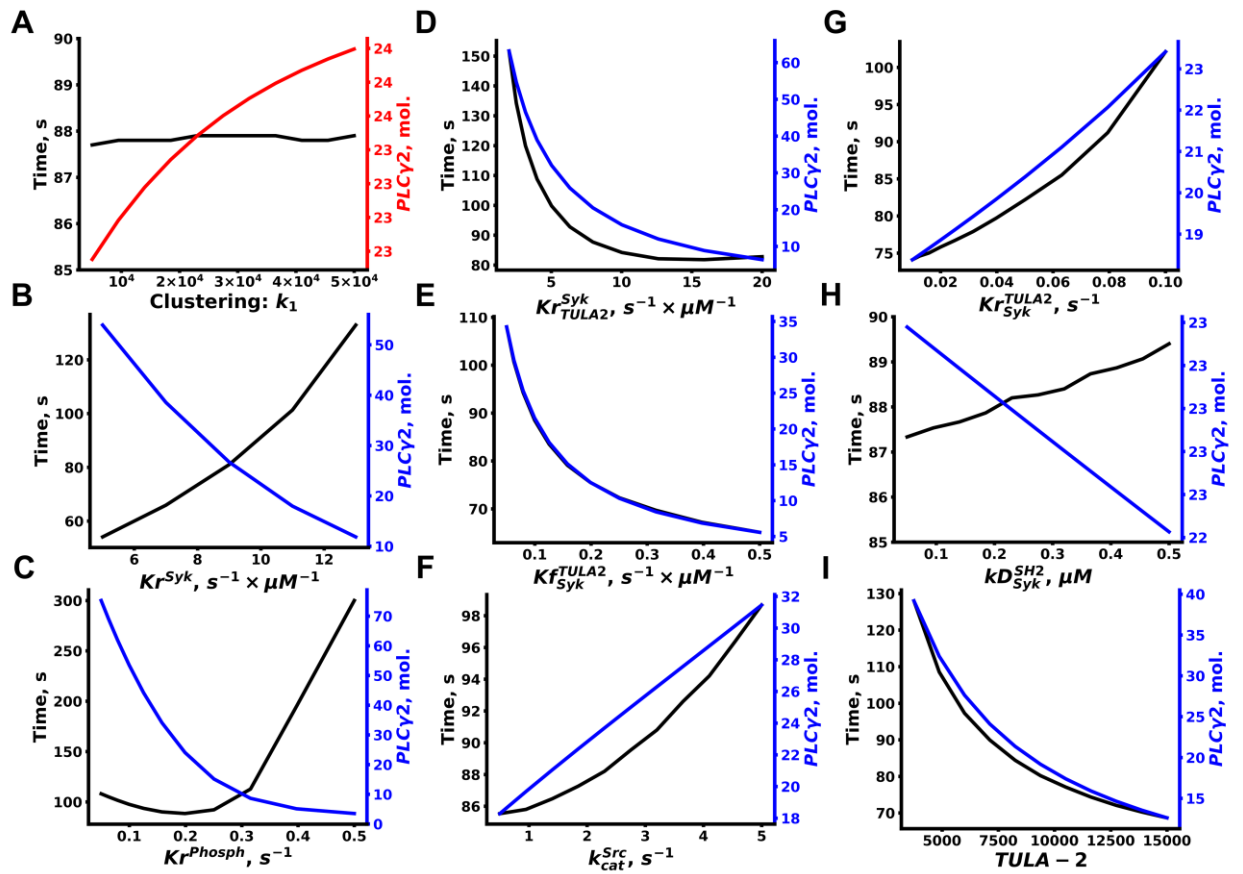

**Figure S6. Explicit variation of the parameters with the sensitivity score above 0.01 for effect on maximal amount of active PLCy2 and time to maximum (from CLEC-2 clustering  $k_1$  to TULA-2 initial concentration).** CLEC-2 clustering  $k_1$  (A), reverse rate of Syk activation by SFK kinases (B), reverse rate of CLEC-2 phosphorylation (C), Syk deactivation by TULA-2 rate (D), forward rate of TULA-2 activation by Syk (E), turnover rate of SFK kinases (F), reverse rate of TULA-2 activation by Syk (G), Syk SH-2 domains  $kD$  from phosphorylated tyrosine residues in hemITAM sequences (H), TULA-2 initial number (I). Red colour highlights “CLEC-2 clustering” module, blue – “Tyrosine kinase” module.



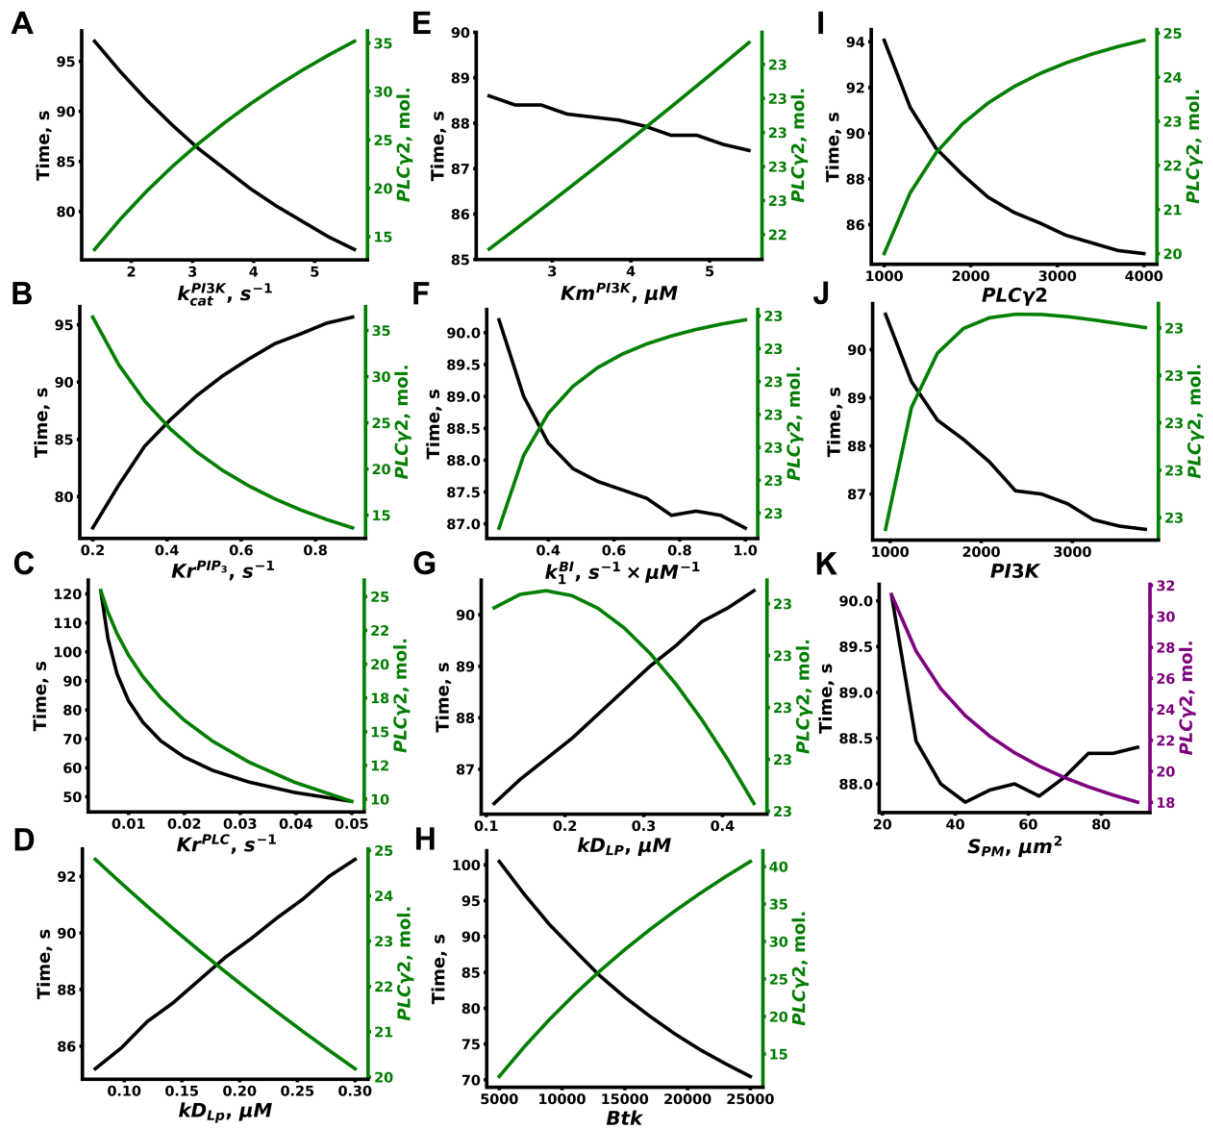

**Figure S7. Explicit variation of the parameters with the sensitivity score above 0.01 for effect on maximal amount of active PLCy2 and time to maximum (from PI3K turnover rate to plasma membrane area).** PI3K turnover rate (A), reverse rate of PIP<sub>3</sub> production by PI3K (B), reverse rate of PLCy2 activation (C), PLCy2 kD from phosphorylated LAT (D), Michaelis constant of PI3K (E), forward rate of Btk activation upon PIP<sub>3</sub> binding (F), PI3K kD from phosphorylated LAT (G), Btk initial number (H), PLCy2 initial number (I), PI3K initial number (J), plasma membrane area (K). Green – “LAT-PLCy2” module, purple – initial volumes of the model compartments.

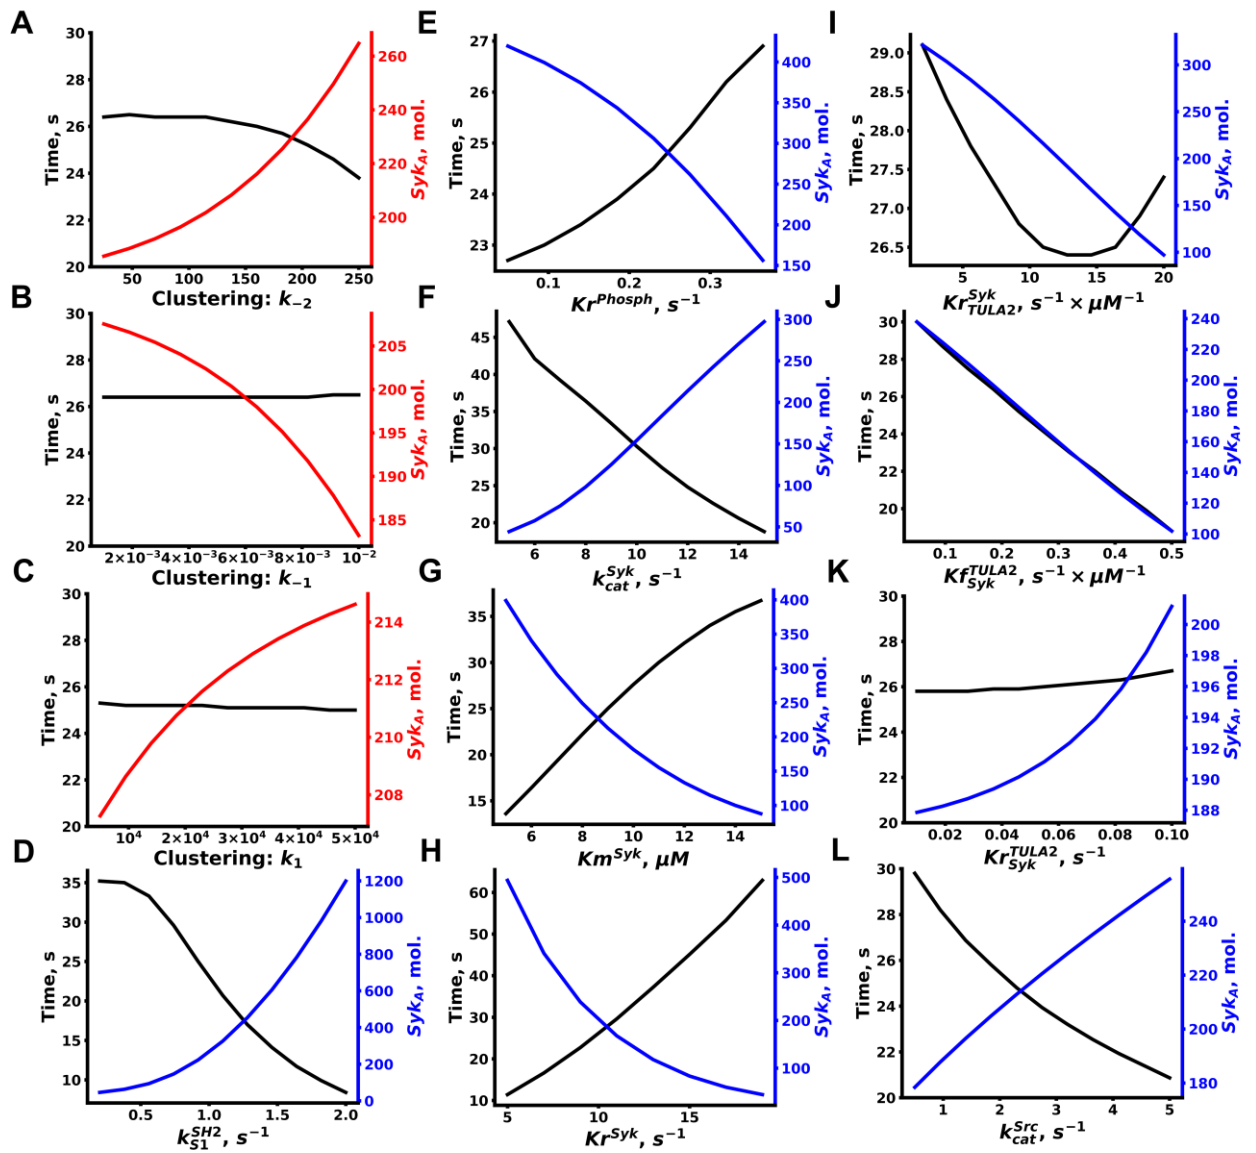

**Figure S8. Explicit variation of the parameters with the sensitivity score above 0.01 for effect on maximal amount of active Syk kinases and time to maximum (from CLEC-2 clustering  $k_{-2}$  to turnover rate of SFK).** CLEC-2 clustering  $k_{-2}$  (A), CLEC-2 clustering  $k_{-1}$  (B), CLEC-2 clustering  $k_1$  (C), forward rate of Syk activation upon SH-2 domain binding to dually phosphorylated hemITAMs (D), reverse rate of CLEC-2 phosphorylation (E), turnover rate of Syk kinases (F), Michaelis constant of Syk kinases (G), reverse rate of Syk activation by SFK kinases (H), Syk deactivation by TULA-2 rate (I), forward rate of TULA-2 activation by Syk (J), reverse rate of TULA-2 activation by Syk (K), turnover rate of SFK kinases (L). Red colour highlights “CLEC-2 clustering” module, blue – “Tyrosine kinase” module.

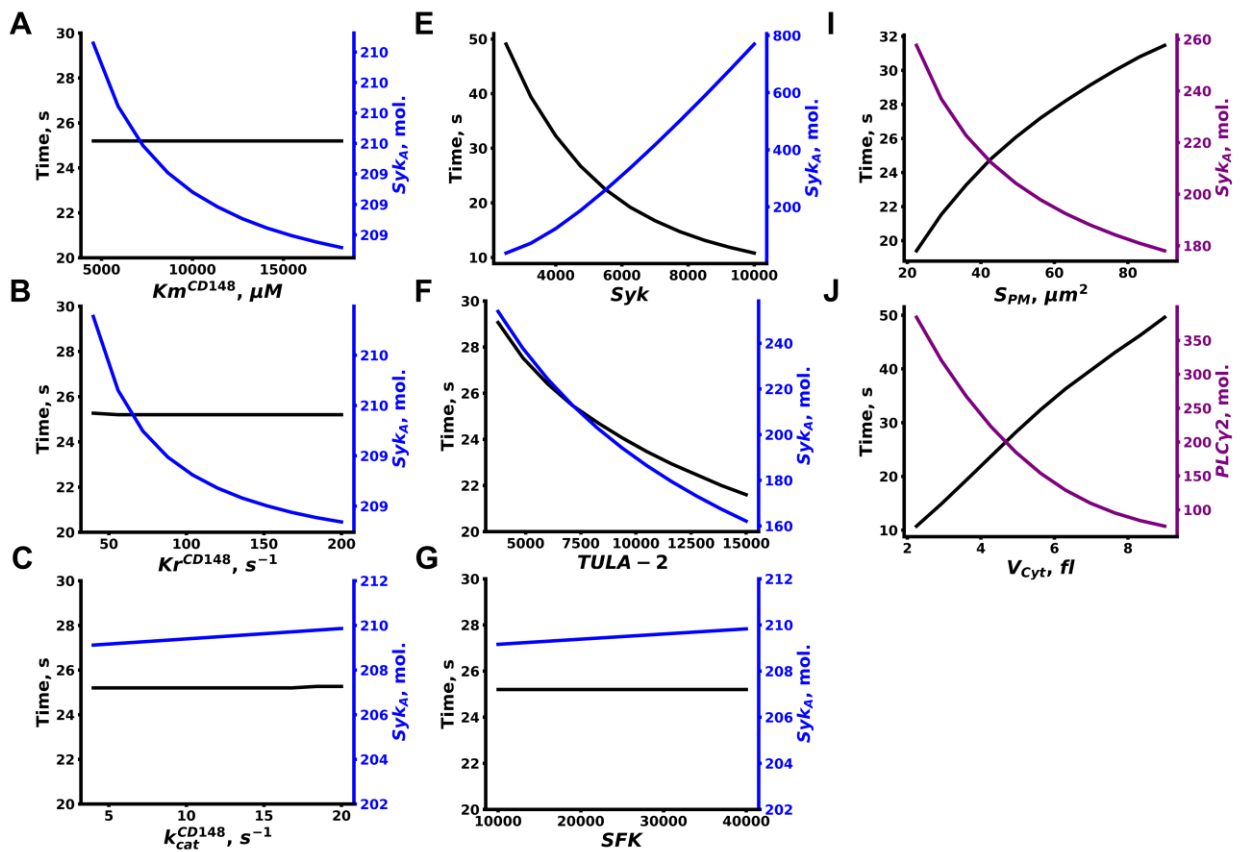

**Figure S9. Explicit variation of the parameters with the sensitivity score above 0.01 for effect on maximal amount of active Syk kinases and time to maximum (from Michaelis constant of CD148 to platelet cytosol volume).** Michaelis constant of CD148 (A), reverse rate of CD148 activation (B), turnover rate of CD148 (C), Syk initial number (D), TULA-2 initial number (E), SFK initial number (F), plasma membrane area (I), platelet cytosol volume (J). Blue – “Tyrosine kinase” module, purple – initial volumes of the model compartments.

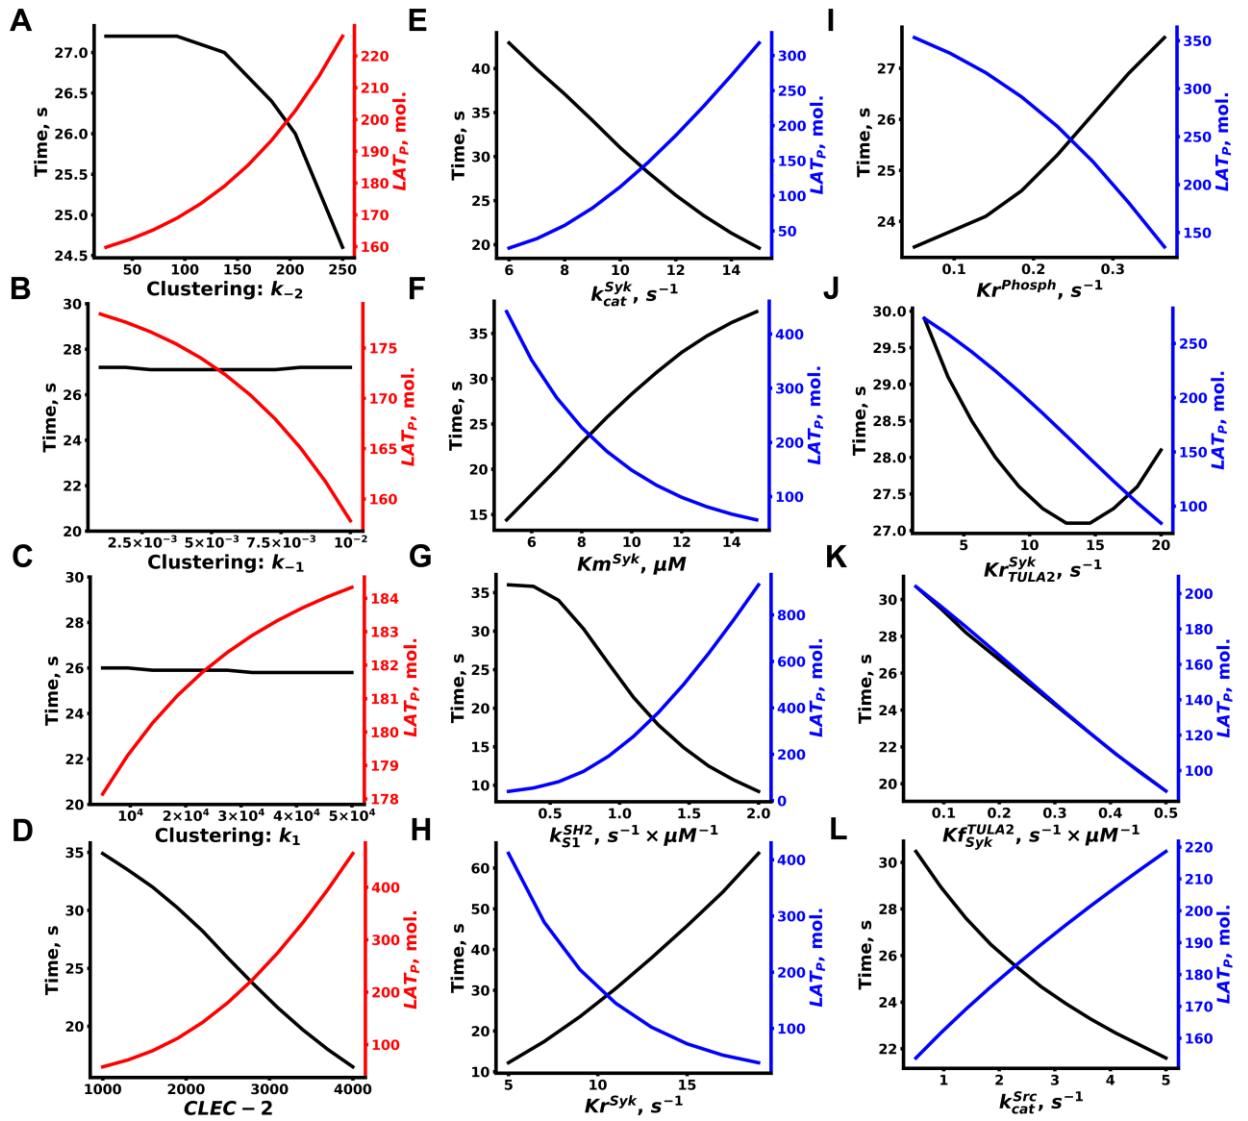

**Figure S10.** Explicit variation of the parameters with the sensitivity score above 0.01 for effect on maximal amount of phosphorylated LAT and time to maximum (from CLEC-2 clustering  $k_{-2}$  to turnover rate of SFK). CLEC-2 clustering  $k_{-2}$  (A), CLEC-2 clustering  $k_{-1}$  (B), CLEC-2 clustering  $k_1$  (C), CLEC-2 initial number (D), turnover rate of Syk kinases (E), Michaelis constant of Syk kinases (F), forward rate of Syk activation upon SH-2 domain binding to dually phosphorylated hemITAMs (G), reverse rate of Syk activation by SFK kinases (H), reverse rate of CLEC-2 phosphorylation (I), Syk deactivation by TULA-2 rate (J), forward rate of TULA-2 activation by Syk (K), turnover rate of SFK kinases (L). Red colour highlights “CLEC-2 clustering” module, blue – “Tyrosine kinase” module.

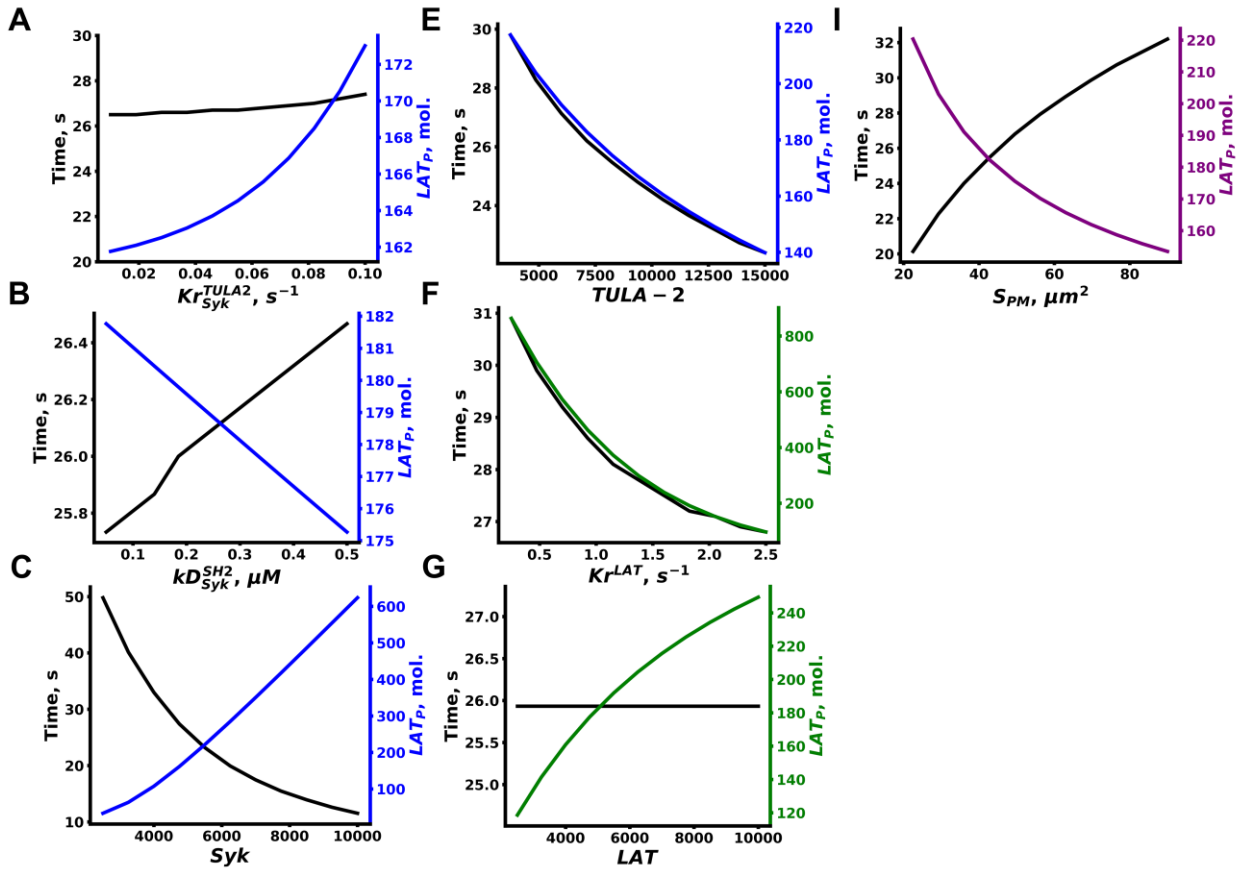

**Figure S11. Explicit variation of the parameters with the sensitivity score above 0.01 for effect on maximal amount of phosphorylated LAT and time to maximum (from the reverse rate of TULA-2 activation by Syk to plasma membrane area).** Reverse rate of TULA-2 activation by Syk (A), Syk SH-2 domains  $kD$  from phosphorylated tyrosine residues in hemITAM sequences (B), Syk initial number (C), TULA-2 initial number (D), reverse rate of LAT phosphorylation (E), LAT initial number (F), plasma membrane area (I). Blue – “Tyrosine kinase” module, green – “LAT-PLC $\gamma$ 2” module, purple – initial volumes of the model compartments.

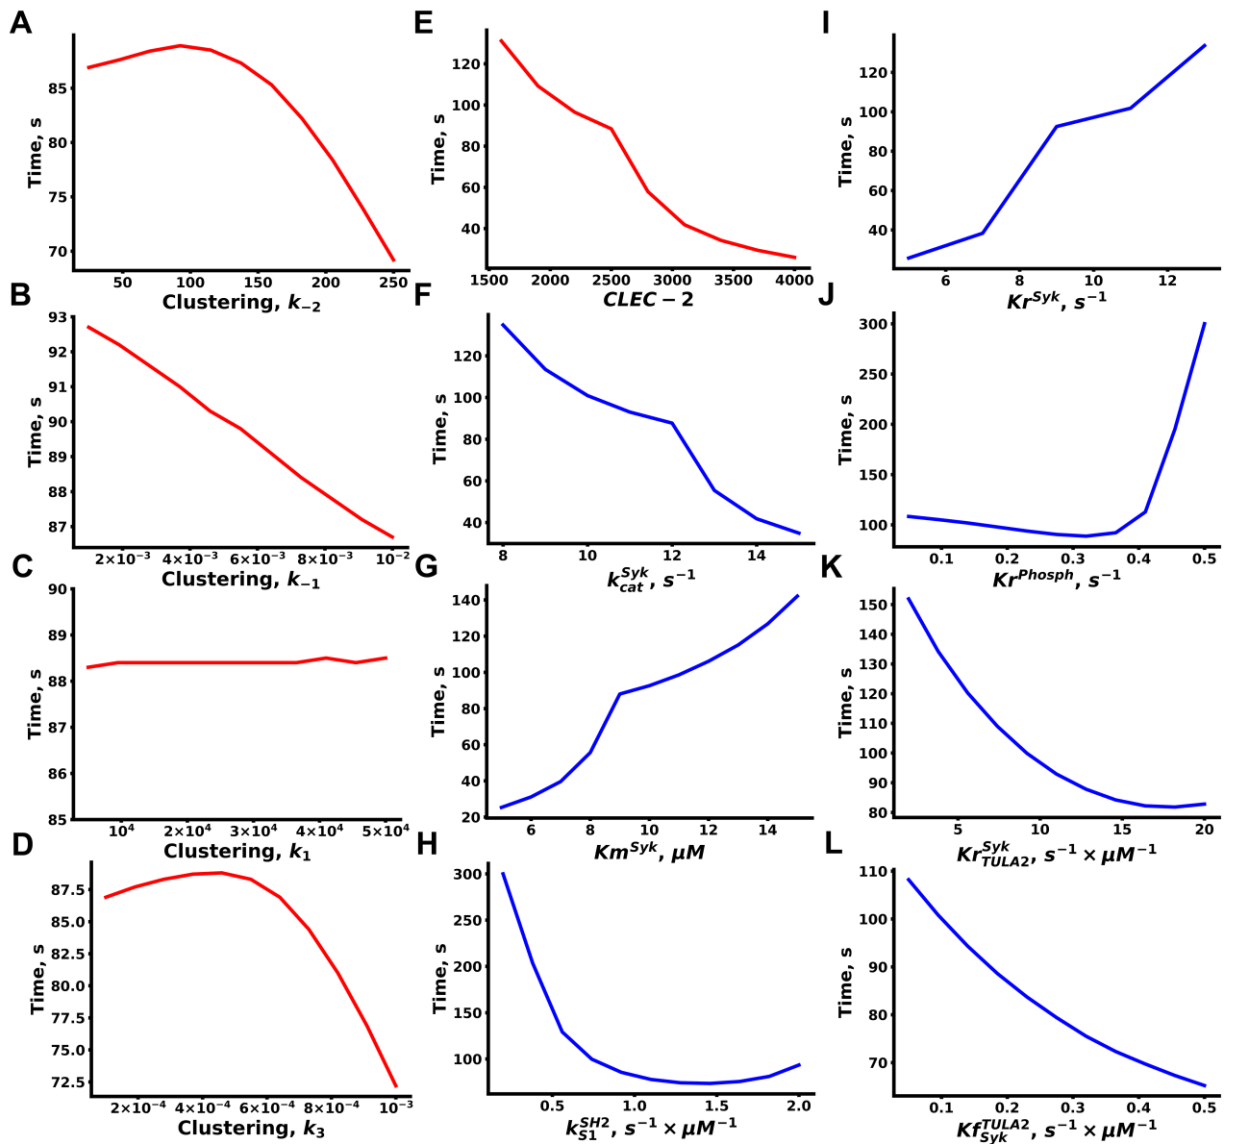

**Figure S12. Explicit variation of the parameters with the sensitivity score above 0.01 for effect on the maximal concentration of  $IP_3$  and time to maximum (from CLEC-2 clustering  $k_{-2}$  to forward rate of TULA-2 activation by Syk). Inflexion point on the graph corresponds to the initiation of calcium oscillations. CLEC-2 clustering  $k_{-2}$  (A), CLEC-2 clustering  $k_{-1}$  (B), CLEC-2 clustering  $k_1$  (C), CLEC-2 clustering  $k_3$  (D), CLEC-2 initial number (E), turnover rate of Syk kinases (F), Michaelis constant of Syk kinases (G), forward rate of Syk activation upon SH-2 domain binding to dually phosphorylated hemiTAMs (H), reverse rate of Syk activation by SFK kinases (I), reverse rate of CLEC-2 phosphorylation (J), Syk deactivation by TULA-2 rate (K), forward rate of TULA-2 activation by Syk (L). Red colour highlights “CLEC-2 clustering” module, blue – “Tyrosine kinase” module.**

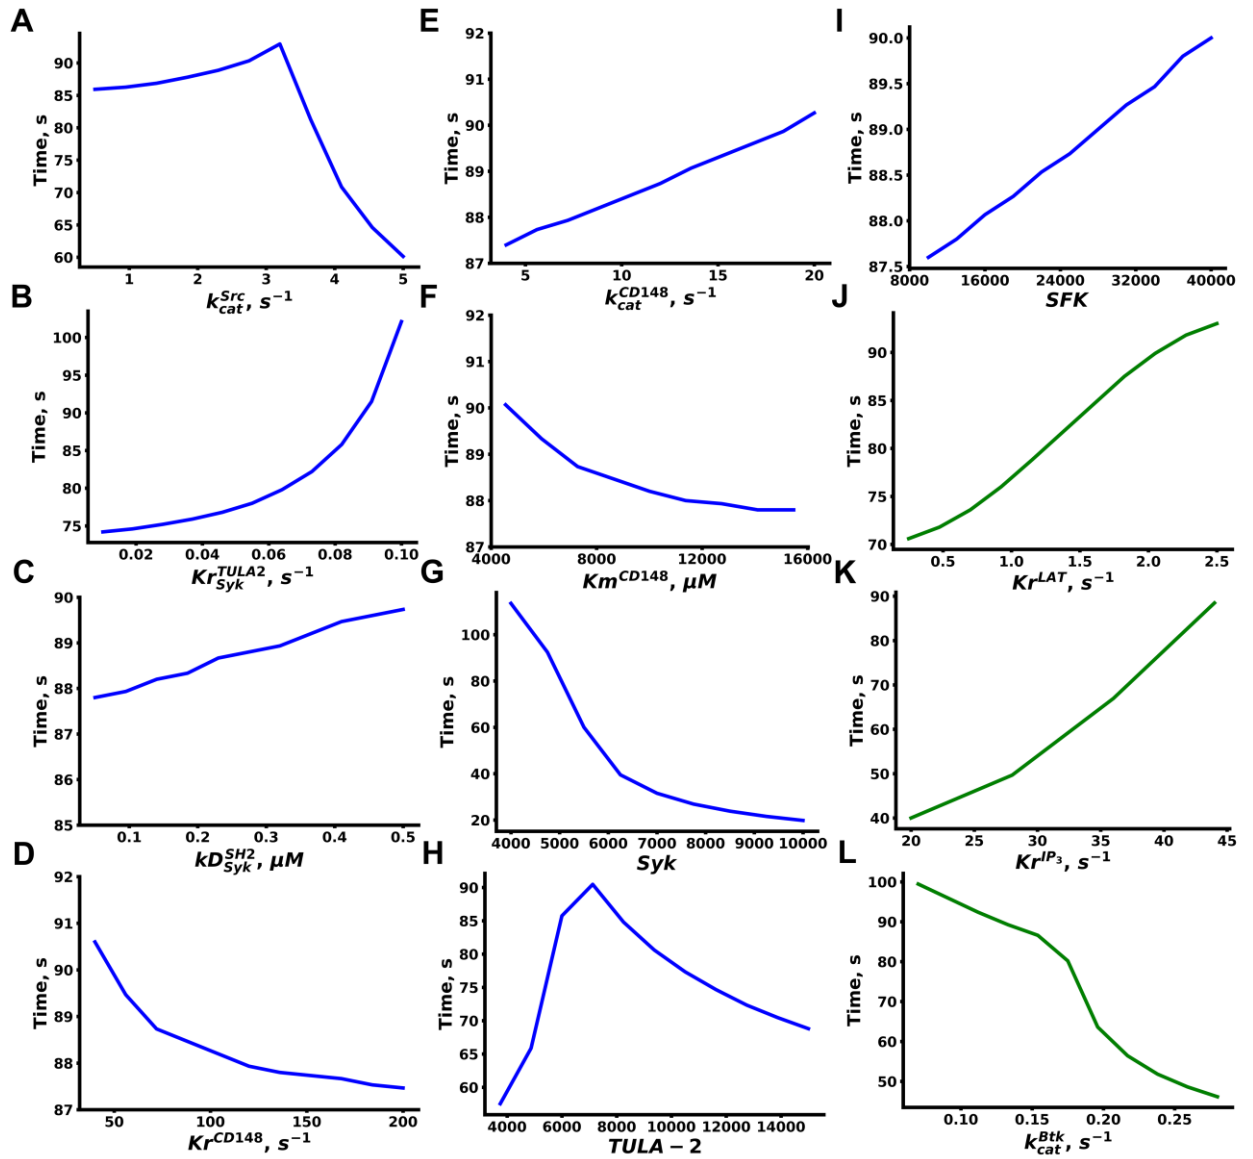

**Figure S13.** Explicit variation of the parameters with the sensitivity score above 0.01 for effect on the maximal concentration of IP<sub>3</sub> and time to maximum (turnover rate of SFK to turnover rate of Btk). Inflexion point on the graph corresponds to the initiation of calcium oscillations. Turnover rate of SFK (A), reverse rate of TULA-2 activation by Syk (B), Syk SH-2 domains kD from phosphorylated tyrosine residues in hemITAM sequences (C), reverse rate of CD148 activation (D), turnover rate of CD148 (E), Michaelis constant of CD148 (F), Syk initial number (G), TULA-2 initial number (H), SFK initial number (I), reverse rate of LAT phosphorylation (J), reverse rate of IP<sub>3</sub> production (K), turnover rate of Btk (L). Blue – “Tyrosine kinase” module, green – “LAT-PLC $\gamma$ 2” module.

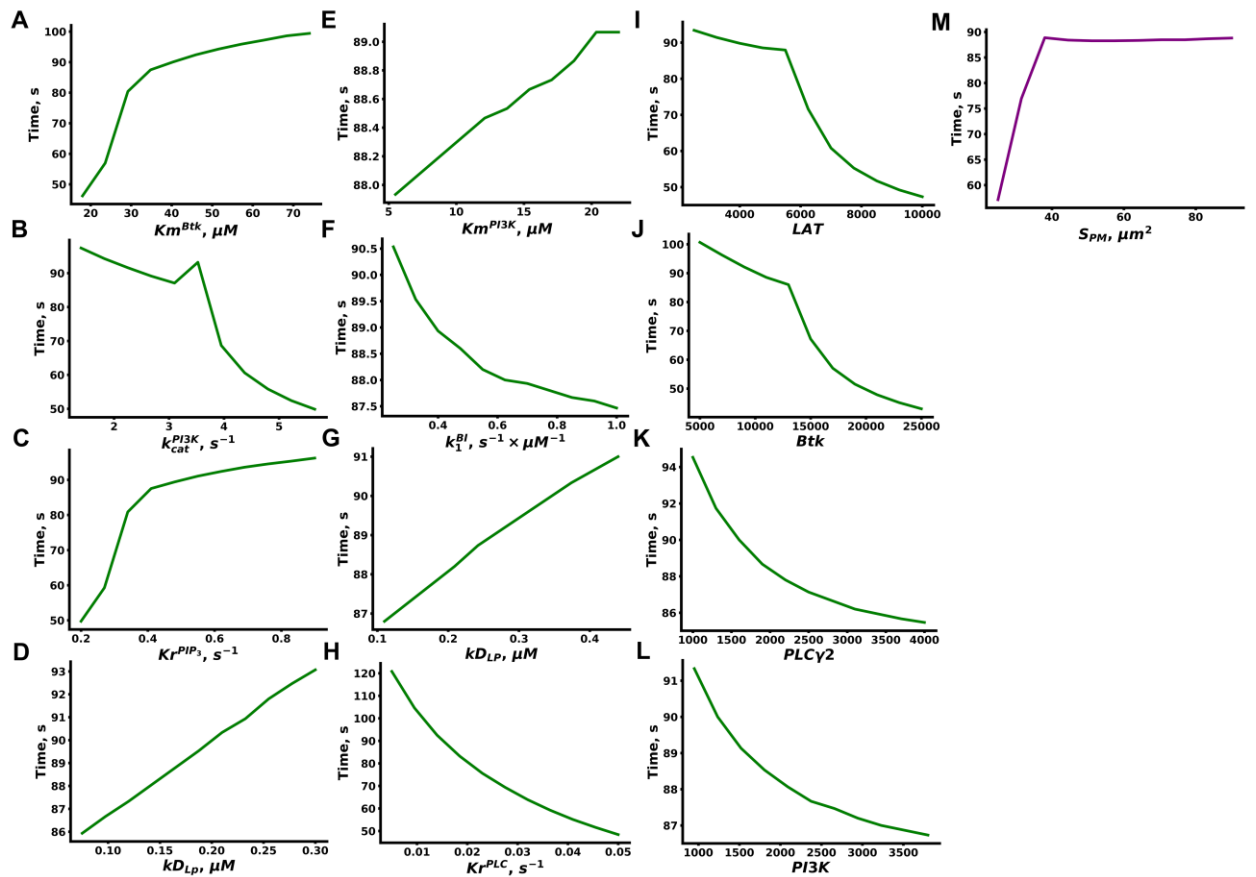

**Figure S14. Explicit variation of the parameters with the sensitivity score above 0.01 for effect on the maximal concentration of IP<sub>3</sub> and time to maximum (from Michaelis constant of Btk to plasma membrane area). Inflexion point on the graph corresponds to the initiation of calcium oscillations.** Michaelis constant of Btk (A), turnover rate of PI3K (B), reverse rate of PIP<sub>3</sub> production by PI3K (C), PLCy2 kD from phosphorylated LAT (D), Michaelis constant of PI3K (E), forward rate of Btk activation upon PIP<sub>3</sub> binding (F), PI3K kD from phosphorylated LAT (G), reverse rate of PLCy2 activation (H), LAT initial number (I), Btk initial number (J), PLCy2 initial number (K), PI3K initial number (L), plasma membrane area (M). Green – “LAT-PLC2” module, purple – initial volumes of the model compartments.



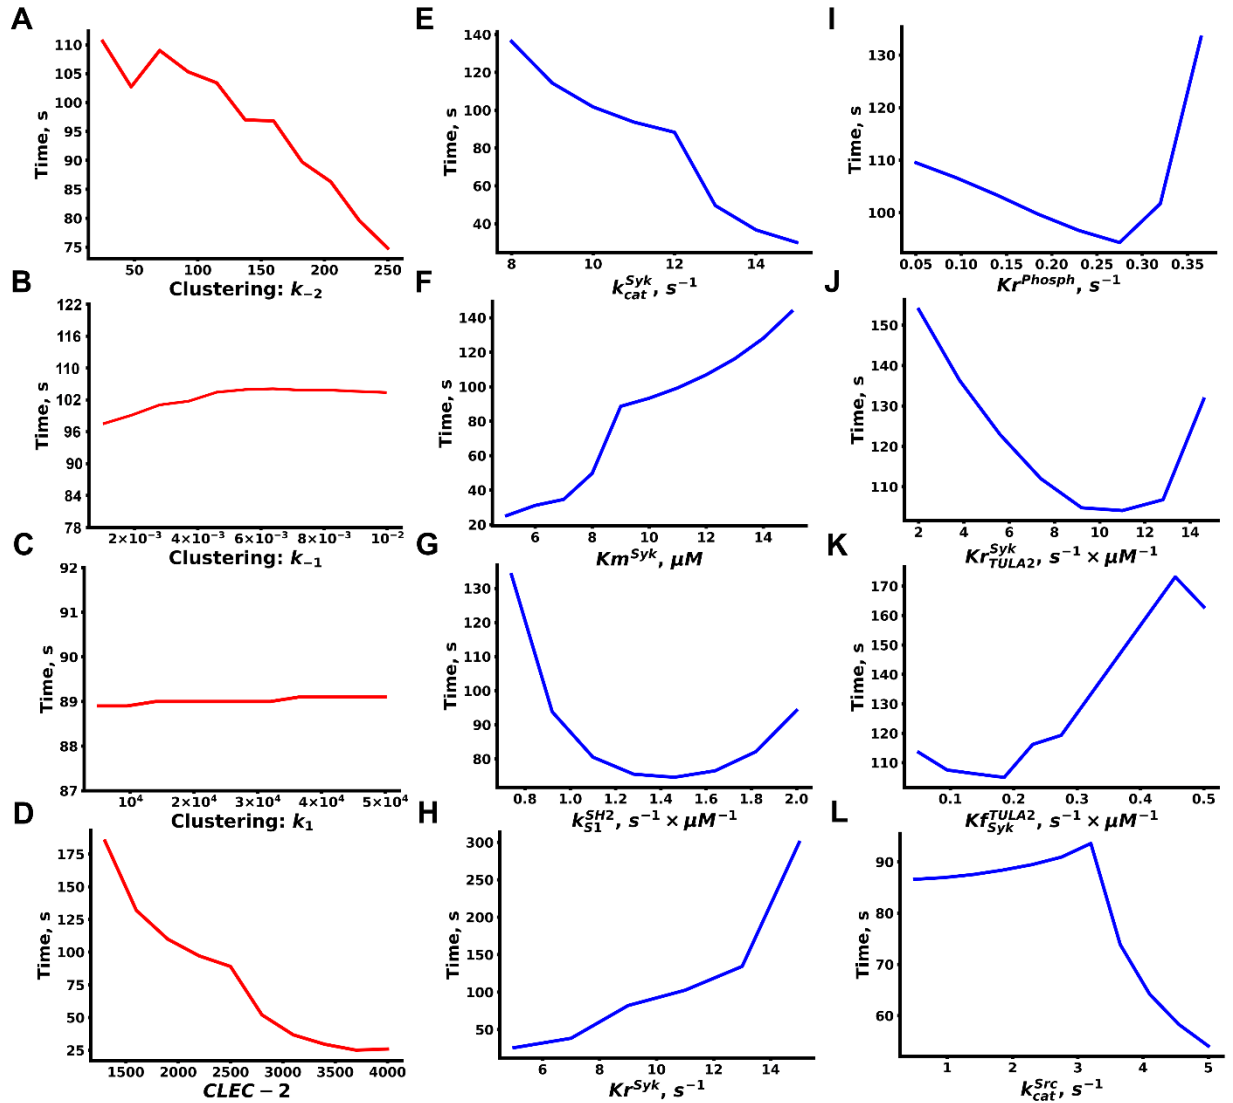

**Figure S15. Explicit variation of the parameters with the sensitivity score above 0.01 for effect on the maximal concentration of cytosolic calcium and time to maximum (from CLEC-2 clustering  $k_{-2}$  to turnover rate of SFK). Inflexion point on the graph corresponds to the initiation of calcium oscillations. CLEC-2 clustering  $k_{-2}$  (A), CLEC-2 clustering  $k_{-1}$  (B), CLEC-2 clustering  $k_1$  (C), CLEC-2 initial number (D), turnover rate of Syk kinases (E), Michaelis constant of Syk kinases (F), forward rate of Syk activation upon SH-2 domain binding to dually phosphorylated hemITAMs (G), reverse rate of Syk activation by SFK kinases (H), reverse rate of CLEC-2 phosphorylation (I), Syk deactivation by TULA-2 rate (J), forward rate of TULA-2 activation by Syk (K), turnover rate of SFK (L). Red colour highlights “CLEC-2 clustering” module, blue – “Tyrosine kinase” module.**

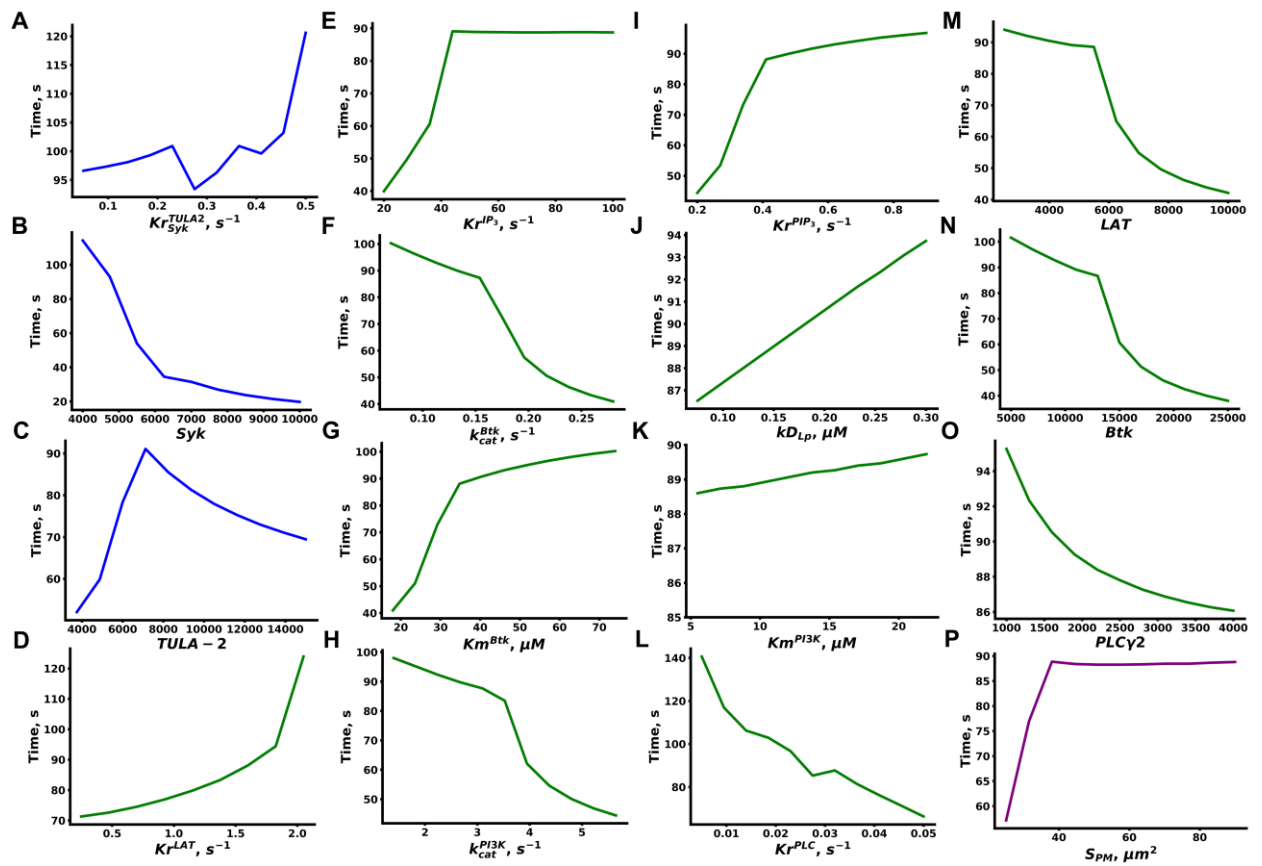

**Figure S16. Explicit variation of the parameters with the sensitivity score above 0.01 for effect on the maximal concentration of cytosolic calcium and time to maximum (turnover rate of SFK to turnover rate of Btk). Inflection point on the graph corresponds to the initiation of calcium oscillations. Reverse rate of TULA-2 activation by Syk (A), Syk initial number (B), TULA-2 initial number (C), reverse rate of LAT phosphorylation (D), reverse rate of  $IP_3$  production (E), turnover rate of Btk (F), Michaelis constant of Btk (G), turnover rate of PI3K (H), reverse rate of  $PIP_3$  production by PI3K (I), PLCy2 kD from phosphorylated LAT (D) (J), Michaelis constant of PI3K (K), reverse rate of PLCy2 activation (L), LAT initial number (M), Btk initial number (N), PLCy2 initial number (O), plasma membrane area (P).**

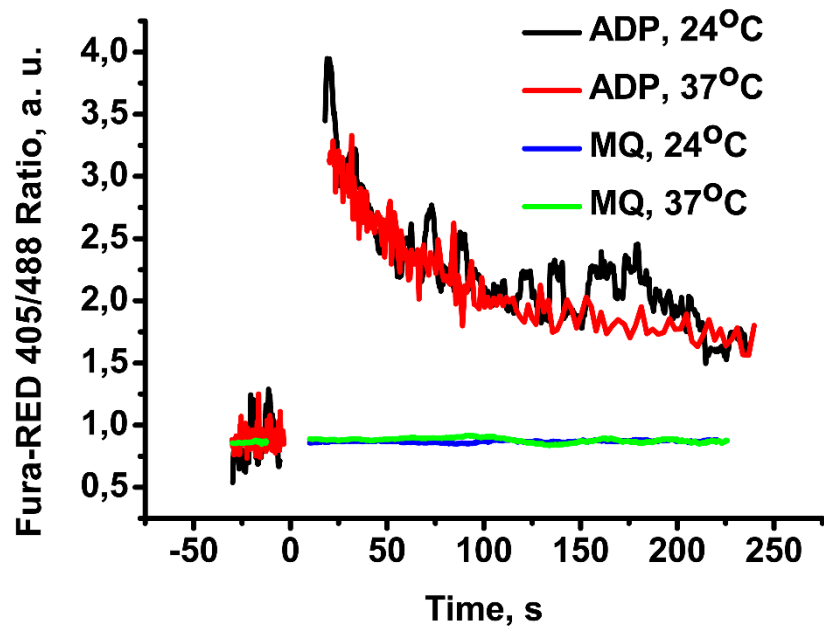

Figure S17. Activation of platelets by 2 $\mu$ M ADP was independent of temperature conditions.

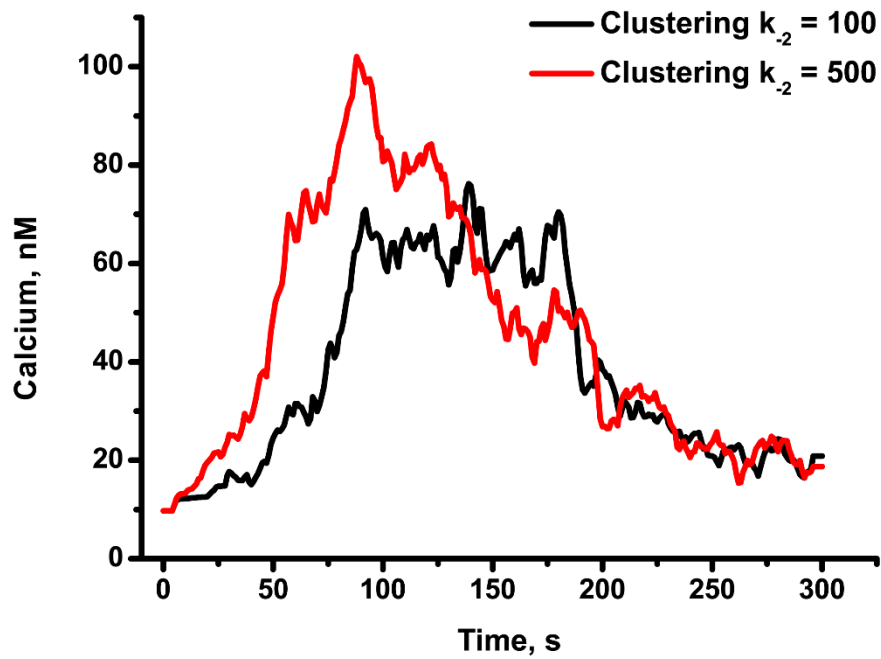

Figure S18. CLEC-2 induced calcium response in platelets, averaged over 100 stochastic runs at different CLEC-2 cluster formation rates.

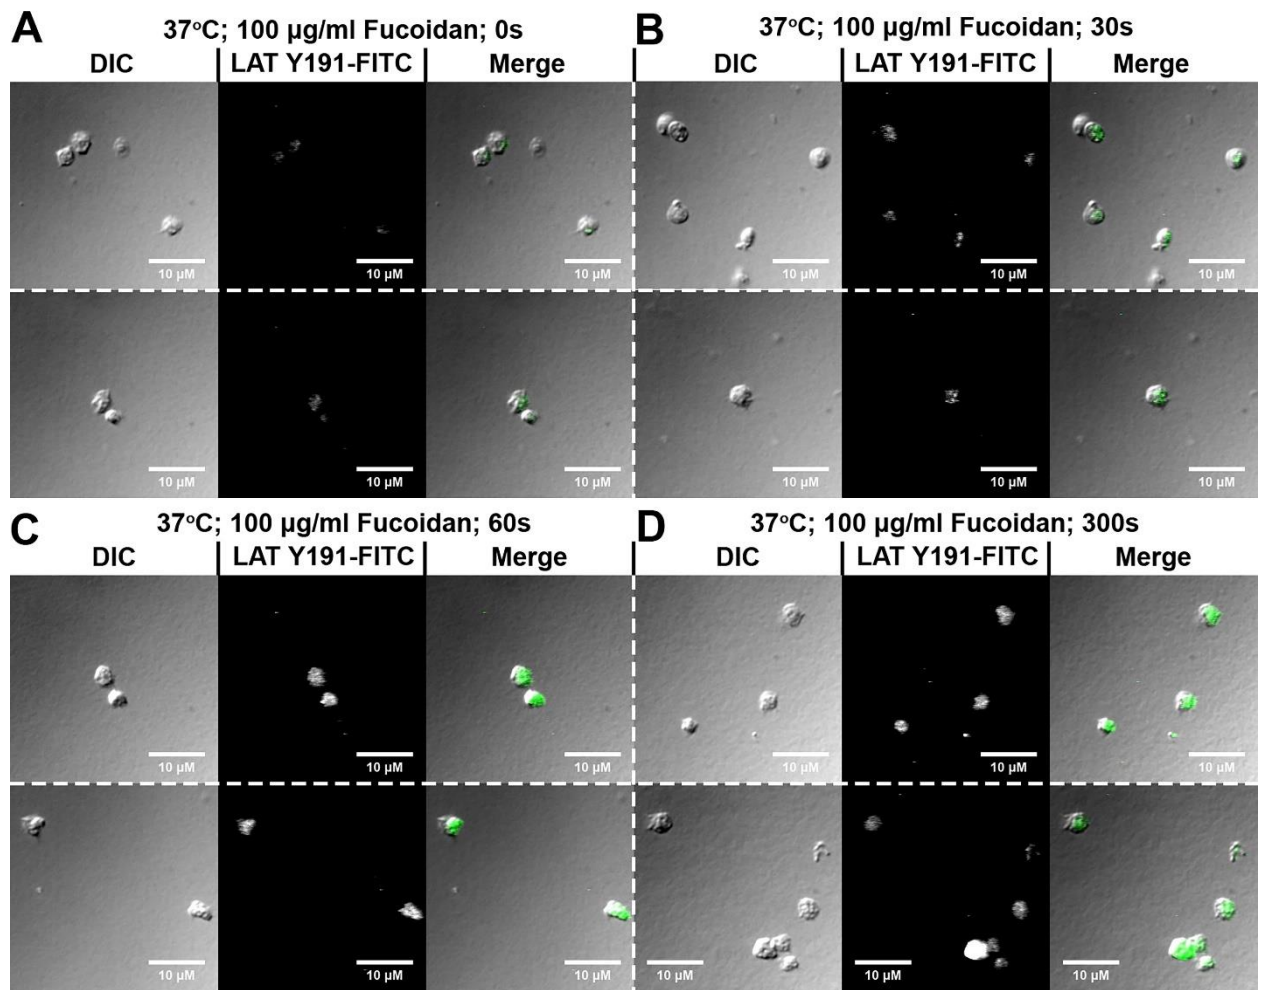

**Figure S19.** Immunofluorescence of platelets activated by 100 µg/ml Fucoidan at 37°C, fixed at different time-points and stained for phosphorylated LAT. (A) Resting platelets; (B) 30 second incubation with the activator; (C) 60 second incubation with the activator; (D) 300 second incubation with the activator.

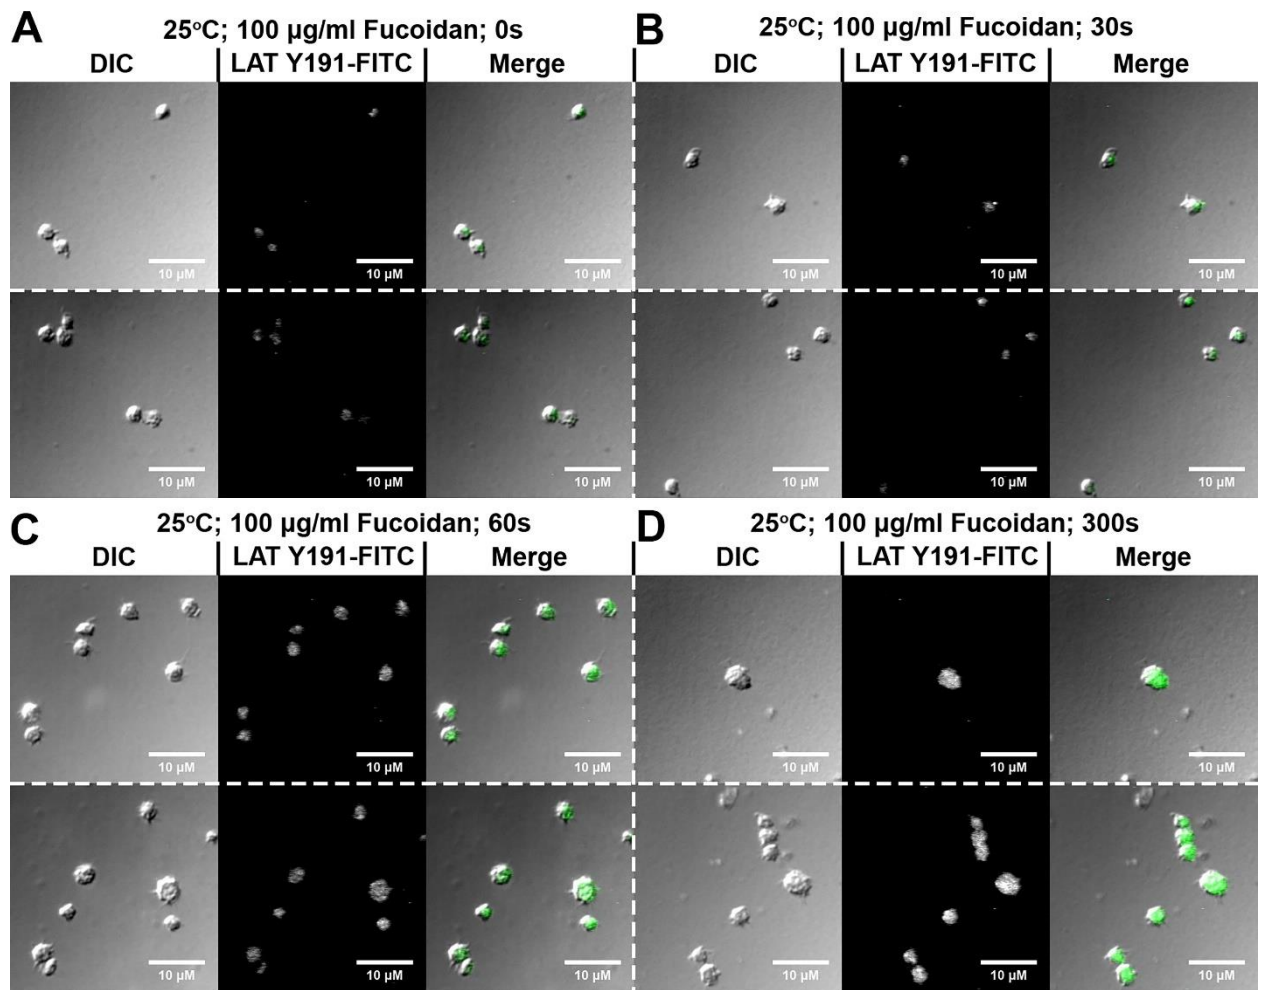

**Figure S20. Immunofluorescence of platelets activated by 100 µg/ml Fucoidan at 25°C, fixed at different time-points and stained for phosphorylated LAT. (A) Resting platelets; (B) 30 second incubation with the activator; (C) 60 second incubation with the activator; (D) 300 second incubation with the activator.**

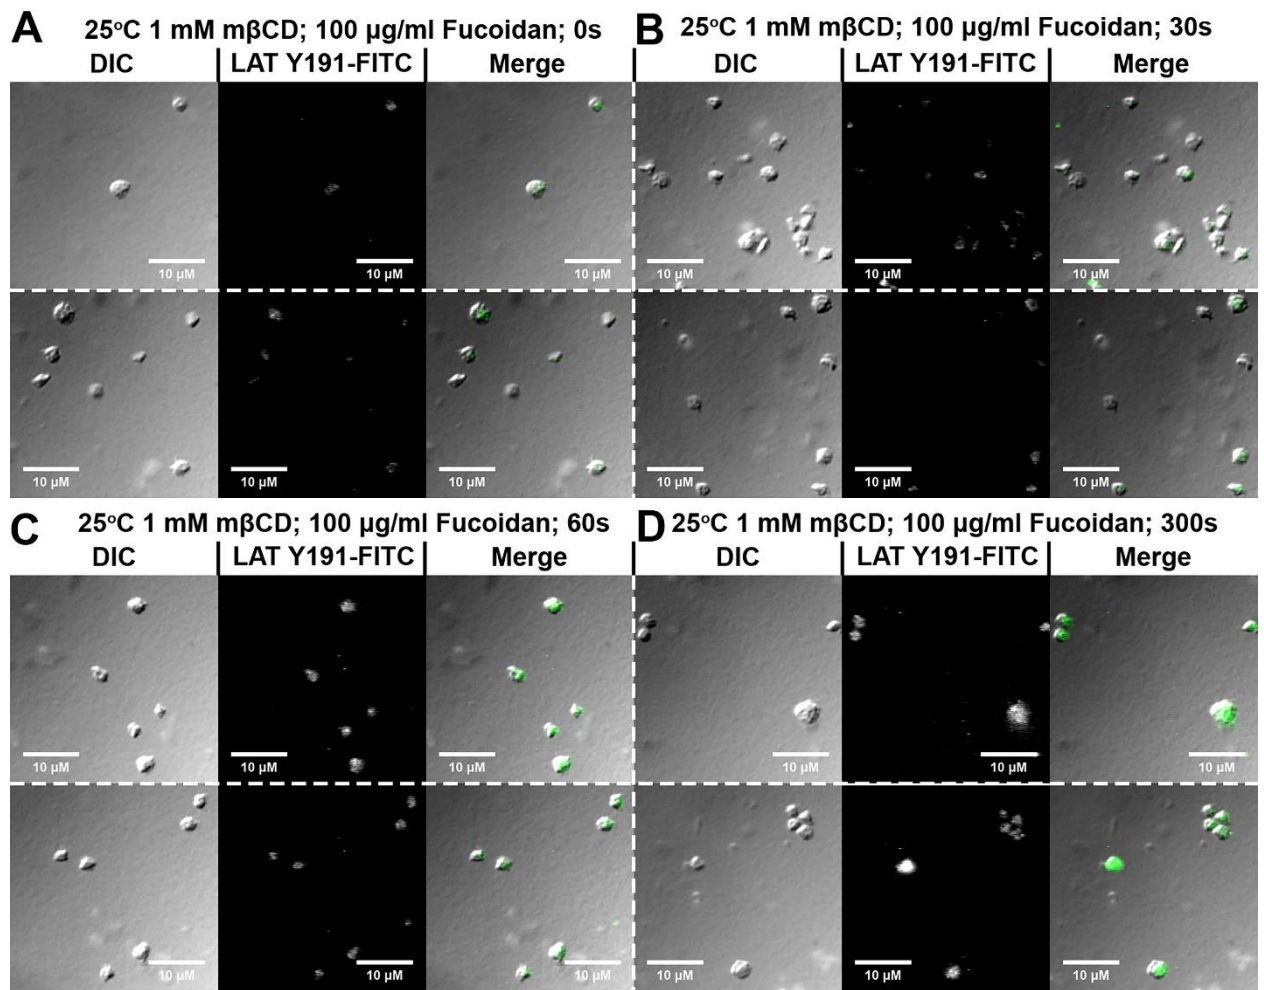

**Figure S21. Immunofluorescence of cholesterol depleted platelets activated by 100  $\mu$ g/ml Fucoidan at 25°C, fixed at different time-points and stained for phosphorylated LAT. (A) Resting platelets; (B) 30 second incubation with the activator; (C) 60 second incubation with the activator; (D) 300 second incubation with the activator.**

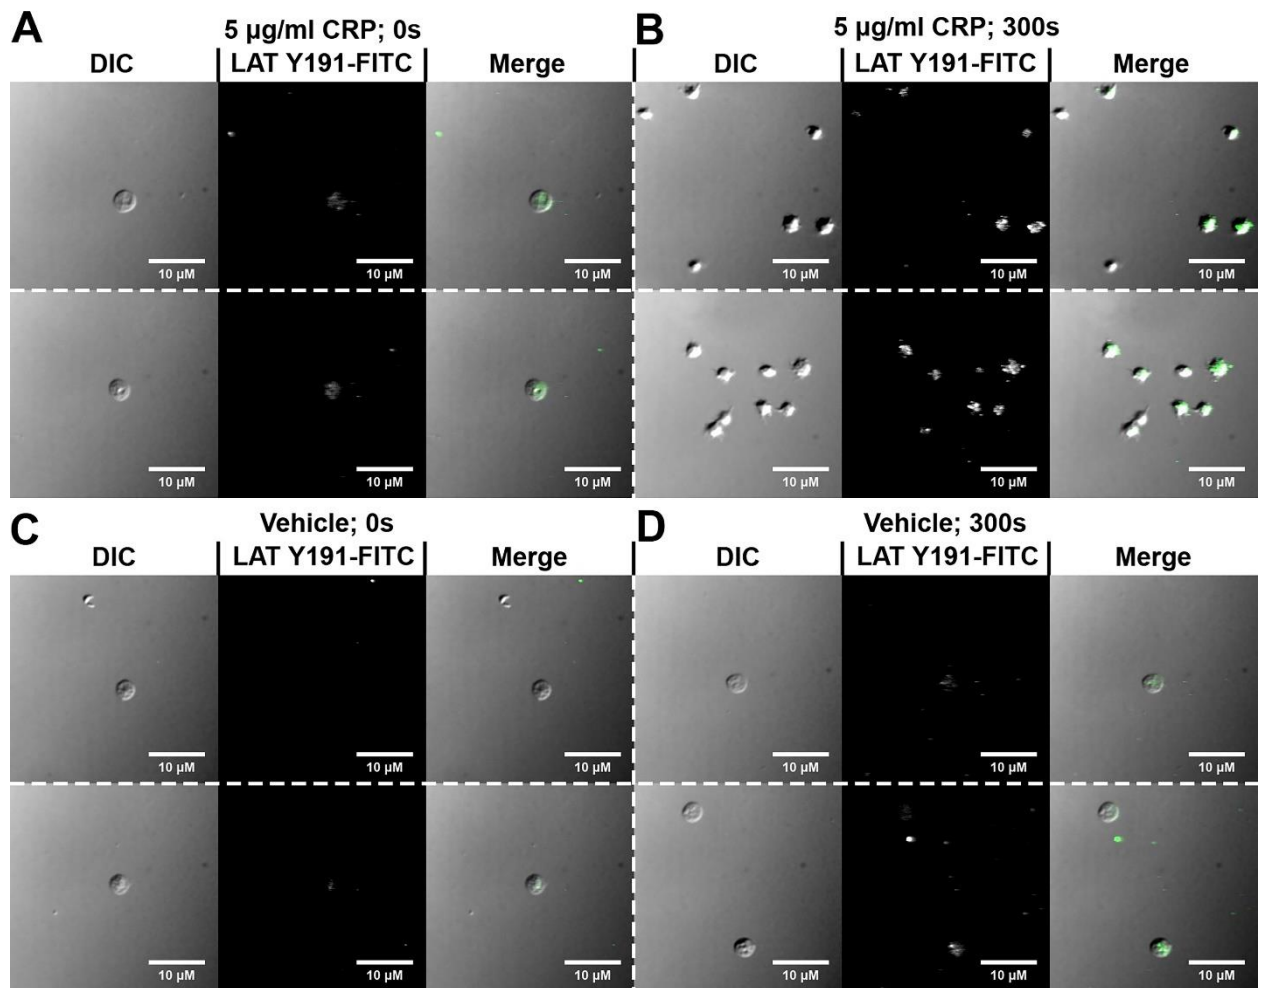

**Figure S22. Immunofluorescence of platelets activated either by 5 µg/ml CRP or incubated with MQ, fixed at different time-points and stained for phosphorylated LAT. (A) Resting platelets; (B) 300 second incubation with the activator; (C) resting platelets; (D) 300 second incubation with MQ.**

#### 4. Supporting references

1. Mori, J., Y.J. Wang, S. Ellison, S. Heising, B.G. Neel, M.L. Tremblay, S.P. Watson, and Y.A. Senis. 2012. Dominant role of the protein-tyrosine phosphatase CD148 in regulating platelet activation relative to protein-tyrosine phosphatase-1B. *Arterioscler. Thromb. Vasc. Biol.* 32: 2956–2965.
2. Senis, Y.A., A. Mazharian, and J. Mori. 2014. Src family kinases: at the forefront of platelet activation. *Blood.* 124: 2013–2024.
3. Coxon, C.H., M.J. Geer, and Y.A. Senis. 2017. ITIM receptors: More than just inhibitors of platelet activation. *Blood.* 129: 3407–3418.
4. Bradshaw, J.M. 2010. The Src, Syk, and Tec family kinases: Distinct types of molecular switches. *Cell. Signal.* 22: 1175–1184.
5. Tiganis, T., and A.M. Bennett. 2007. Protein tyrosine phosphatase function: the substrate perspective. *Biochem. J.* 402: 1 LP – 15.
6. Spring, K., C. Chabot, S. Langlois, L. Lapointe, N.T.N. Trinh, C. Caron, J.K. Hebda, J. Gavard, M. Elchebly, and I. Royal. 2012. Tyrosine phosphorylation of DEP-1/CD148 as a mechanism controlling Src kinase activation, endothelial cell permeability, invasion, and capillary formation. *Blood.* 120: 2745–2756.
7. Rathore, V.B., M. Okada, P.J. Newman, and D.K. Newman. 2007. Paxillin family members function as Csk-binding proteins that regulate Lyn activity in human and murine platelets. *Biochem. J.* 403: 275–281.

8. Lin, X., S. Lee, and G. Sun. 2003. Functions of the activation loop in Csk protein-tyrosine kinase. *J. Biol. Chem.* 278: 24072–24077.
9. Hughes, C.E., B.A. Finney, F. Koentgen, K.L. Lowe, and S.P. Watson. 2015. The N-terminal SH2 domain of Syk is required for ( hem ) ITAM , but not integrin , signaling in mouse platelets. *Blood.* 125: 144–155.
10. Severin, S., A.Y. Pollitt, L. Navarro-Nunez, C.A. Nash, D. Mour??o-S??, J.A. Eble, Y.A. Senis, and S.P. Watson. 2011. Syk-dependent phosphorylation of CLEC-2: A novel mechanism of hem-immunoreceptor tyrosine-based activation motif signaling. *J. Biol. Chem.* 286: 4107–4116.
11. Garzon Dasgupta, A.K., A.A. Martyanov, A.A. Filkova, M.A. Panteleev, and A.N. Sveshnikova. 2020. Development of a simple kinetic mathematical model of aggregation of proteins or clustering of receptors. *Submiss. .*
12. Pollitt, A.Y., N.S. Poulter, E. Gitz, L. Navarro-Nuñez, Y.J. Wang, C.E. Hughes, S.G. Thomas, B. Nieswandt, M.R. Douglas, D.M. Owen, D.G. Jackson, M.L. Dustin, and S.P. Watson. 2014. Syk and src family kinases regulate c-type lectin receptor 2 (clec-2)-mediated clustering of podoplanin and platelet adhesion to lymphatic endothelial cells. *J. Biol. Chem.* 289: 35695–35710.
13. Filkova, A.A., A.A. Martyanov, A.K. Garzon Dasgupta, M.A. Panteleev, and A.N. Sveshnikova. 2019. Quantitative dynamics of reversible platelet aggregation: mathematical modelling and experiments. *Sci. Rep.* 9: 6217.
14. Manne, B.K., T.M. Getz, C.E. Hughes, O. Alshehri, C. Dangelmaier, U.P. Naik, S.P. Watson, and S.P. Kunapuli. 2013. Fucoidan is a novel platelet agonist for the C-type lectin-like receptor 2 (CLEC-2). *J. Biol. Chem.* 288: 7717–7726.
15. Musumeci, L., M.J. Kuijpers, K. Gilio, A. Hego, E. Th????tre, L. Maurissen, M. Vandereyken, C. V. Diogo, C. Lecut, W. Guilmain, E. V. Bobkova, J.A. Eble, R. Dahl, P. Drion, J. Rascon, Y. Mostofi, H. Yuan, E. Sergienko, T.D.Y. Chung, M. Thiry, Y. Senis, M. Moutschen, T. Mustelin, P. Lancellotti, J.W.M. Heemskerck, L. Tautz, C. Oury, and S. Rahmouni. 2015. Dual-specificity phosphatase 3 deficiency or inhibition limits platelet activation and arterial thrombosis. *Circulation.* 131: 656–668.
16. Sveshnikova, A.N., A. V. Balatskiy, A.S. Demianova, T.O. Shepelyuk, S.S. Shakhidzhanov, M.N. Balatskaya, A. V. Pichugin, F.I. Ataulakhanov, and M.A. Panteleev. 2016. Systems biology insights into the meaning of the platelet’s dual-receptor thrombin signaling. *J. Thromb. Haemost.* 14: 2045–2057.
17. Balabin, F.A., and A.N. Sveshnikova. 2016. Computational biology analysis of platelet signaling reveals roles of feedbacks through phospholipase C and inositol 1,4,5-trisphosphate 3-kinase in controlling amplitude and duration of calcium oscillations. *Math. Biosci.* 276: 67–74.
18. Dunster, J.L., F. Mazet, M.J. Fry, J.M. Gibbins, and M.J. Tindall. 2015. Regulation of Early Steps of GPVI Signal Transduction by Phosphatases: A Systems Biology Approach. *PLoS Comput. Biol.* 11: 1–26.
19. Sveshnikova, A.N., F.I. Ataulakhanov, and M.A. Panteleev. 2015. Compartmentalized calcium signaling triggers subpopulation formation upon platelet activation through PAR1. *Mol. BioSyst.* 11: 1052–1060.
20. Eckly, A., J.Y. Rinckel, F. Proamer, N. Ulas, S. Joshi, S.W. Whiteheart, and C. Gachet. 2016. Respective contributions of single and compound granule fusion to secretion by activated platelets. *Blood.* 128: 2538–2549.
21. Gitz, E., A.Y. Pollitt, J.J. Gitz-Francois, O. Alshehri, J. Mori, S. Montague, G.B. Nash, M.R. Douglas, E.E. Gardiner, R.K. Andrews, C.D. Buckley, P. Harrison, and S.P. Watson. 2014. CLEC-2 expression is maintained on activated platelets and on platelet microparticles. *Blood.* 124: 2262–2270.
22. Burkhart, J.M., M. Vaudel, S. Gambaryan, S. Radau, U. Walter, L. Martens, J. Geiger, A. Sickmann, and R.P. Zahedi. 2012. The first comprehensive and quantitative analysis of human platelet protein composition allows the comparative analysis of structural and functional pathways. *Blood.* 120.
23. Kemble, D.J., Y.H. Wang, and G. Sun. 2006. Bacterial expression and characterization of catalytic loop mutants of Src protein tyrosine kinase. *Biochemistry.* 45: 14749–14754.
24. Ren, L., X. Chen, R. Luechapanichkul, N.G. Selner, T.M. Meyer, A.-S. Wavreille, R. Chan, C. Iorio, X. Zhou, B.G. Neel, and D. Pei. 2011. Substrate Specificity of Protein Tyrosine Phosphatases 1B, RPTP $\alpha$ , SHP-1, and SHP-2.



Biochemistry. 50: 2339–2356.

25. Park, M.J., R. Sheng, A. Silkov, D.J. Jung, Z.G. Wang, Y. Xin, H. Kim, P. Thiagarajan-Rosenkranz, S. Song, Y. Yoon, W. Nam, I. Kim, E. Kim, D.G. Lee, Y. Chen, I. Singaram, L. Wang, M.H. Jang, C.S. Hwang, B. Honig, S. Ryu, J. Lorieau, Y.M. Kim, and W. Cho. 2016. SH2 Domains Serve as Lipid-Binding Modules for pTyr-Signaling Proteins. *Mol. Cell.* 62: 7–20.
26. Tsang, E., A.M. Giannetti, D. Shaw, M. Dinh, J.K.Y. Tse, S. Gandhi, A. Ho, S. Wang, E. Papp, and J.M. Bradshaw. 2008. Molecular mechanism of the Syk activation switch. *J. Biol. Chem.* 283: 32650–32659.
27. Hughes, C.E., U. Sinha, A. Pandey, J.A. Eble, C.A. O’Callaghan, and S.P. Watson. 2013. Critical role for an acidic amino acid region in platelet signaling by the HemITAM (hemi-immunoreceptor tyrosine-based activation motif) containing receptor CLEC-2 (C-type lectin receptor-2). *J. Biol. Chem.* 288: 5127–5135.
28. Dinh, M., D. Grunberger, H. Ho, S.Y. Tsing, D. Shaw, S. Lee, J. Barnett, R.J. Hill, D.C. Swinney, and J.M. Bradshaw. 2007. Activation Mechanism and Steady State Kinetics of Bruton’s Tyrosine Kinase. *J. Biol. Chem.* 282: 8768–8776.
29. Hughes, C.E., A.Y. Pollitt, J. Mori, J.A. Eble, M.G. Tomlinson, J.H. Hartwig, C.A. O’Callaghan, K. Fütterer, and S.P. Watson. 2010. CLEC-2 activates Syk through dimerization. *Blood.* 115: 2947–2955.
